# Supplementary material for: Chromatin investigation in the nucleus using a phasor approach to structured illumination microscopy
Source: PubMed Central journal article supplement — Biophys J. 2021 May 1;120(12):2566–76. doi: 10.1016/j.bpj.2021.04.027 (PMC8390874; doi:10.1016/j.bpj.2021.04.027), 2021-05-01
Supplement: mmc1.pdf [file mmc1.pdf]

**Biophysical Journal, Volume 120**

**Supplemental information**

**Chromatin investigation in the nucleus using a phasor approach to structured illumination microscopy**

**Isotta Cainero, Elena Cerutti, Mario Faretta, Gaetano Ivan Dellino, Pier Giuseppe Pelicci, Paolo Bianchini, Giuseppe Vicidomini, Alberto Diaspro, and Luca Lanza**

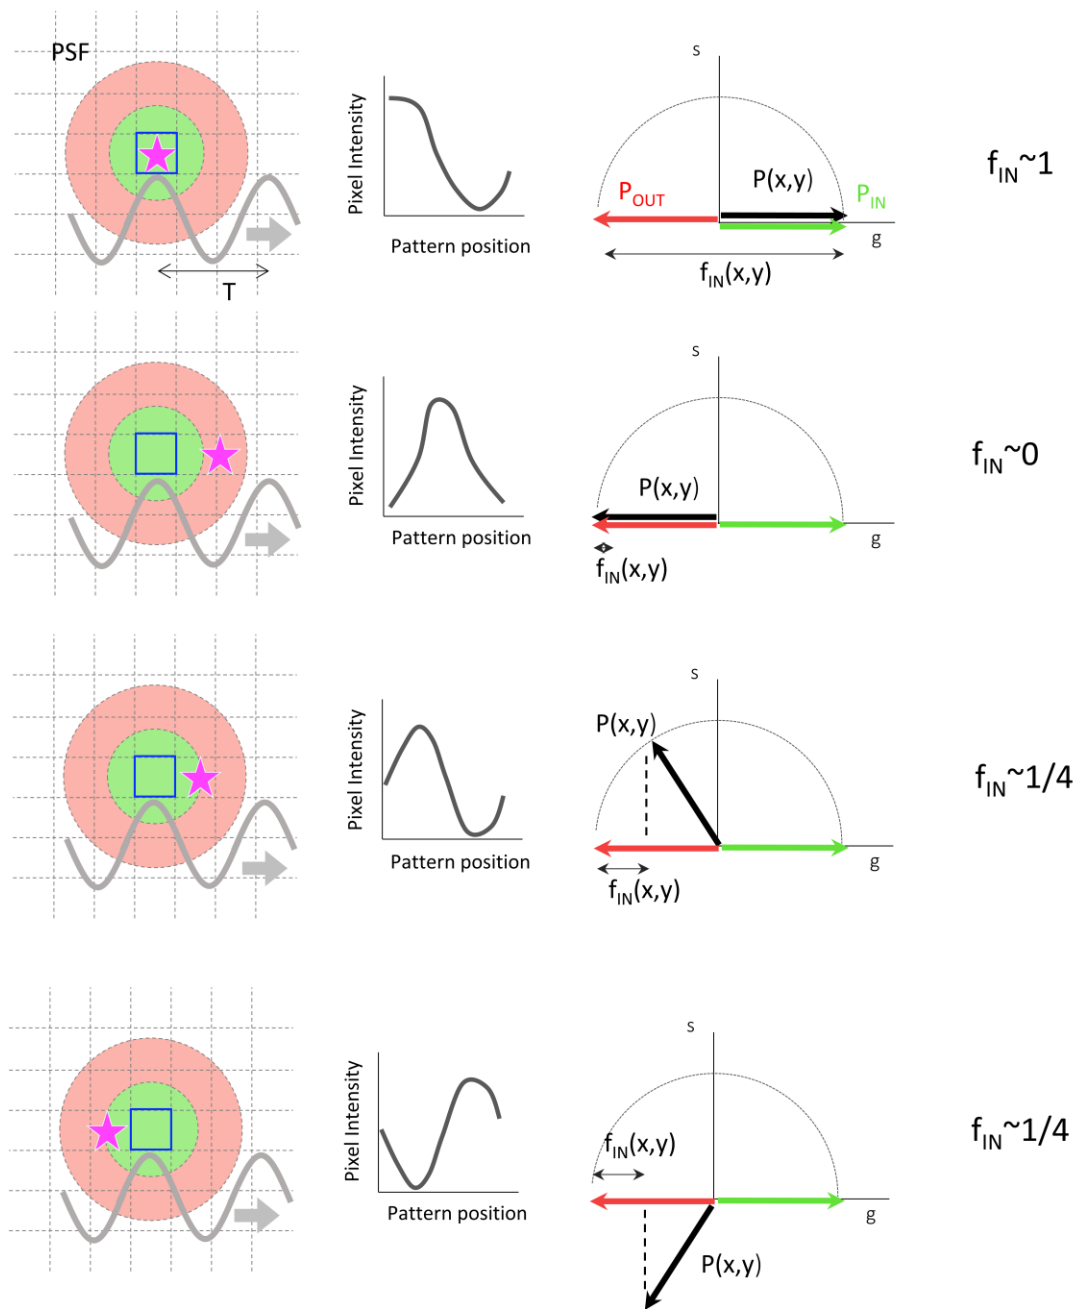

5

6 **Figure S1 | Phasors of single fluorophores.** a) Schematic of the SPLIT-SIM processing for the case of a single  
 7 fluorophore located at different position with respect to the center of the pixel. Shown are (from left to right) the PSF  
 8 and an illumination pattern of period  $T$  translating in the direction of the arrow, the profile of the pixel intensity as a  
 9 function of the pattern position, the decomposition of the corresponding phasor  $\mathbf{P}(x,y)$  in the components  $\mathbf{P}_{in}$  and  $\mathbf{P}_{out}$ .  
 10 Different positions of the fluorophore (indicated by a star) correspond to different phasors and to different values of  
 11 the calculated fraction  $f_{IN}(x,y)$ .

12

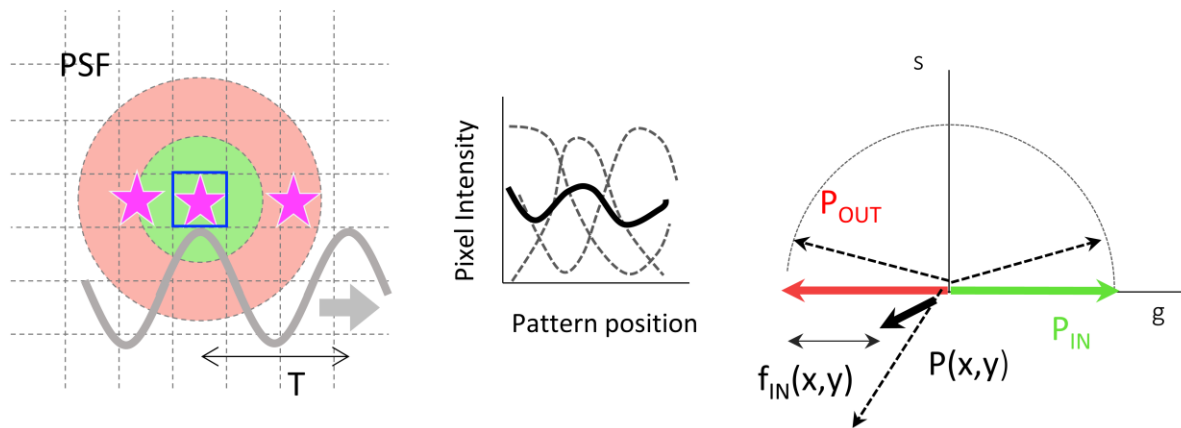

13

14 **Figure S2 | Phasors of multiple fluorophores inside the PSF.** a) Schematic of the SPLIT-SIM processing for the  
 15 case of a multiple fluorophores (indicated by stars) inside the PSF. Shown are (from left to right) the PSF and an  
 16 illumination pattern of period  $T$  translating in the direction of the arrow, the profile of the pixel intensity as a function  
 17 of the pattern position, the decomposition of the corresponding phasor  $\mathbf{P}(x,y)$  in the components  $\mathbf{P}_{in}$  and  $\mathbf{P}_{out}$ . The  
 18 phasor  $\mathbf{P}(x,y)$  is the linear combination of the phasors of the single fluorophores (indicated by dashed arrows).

19

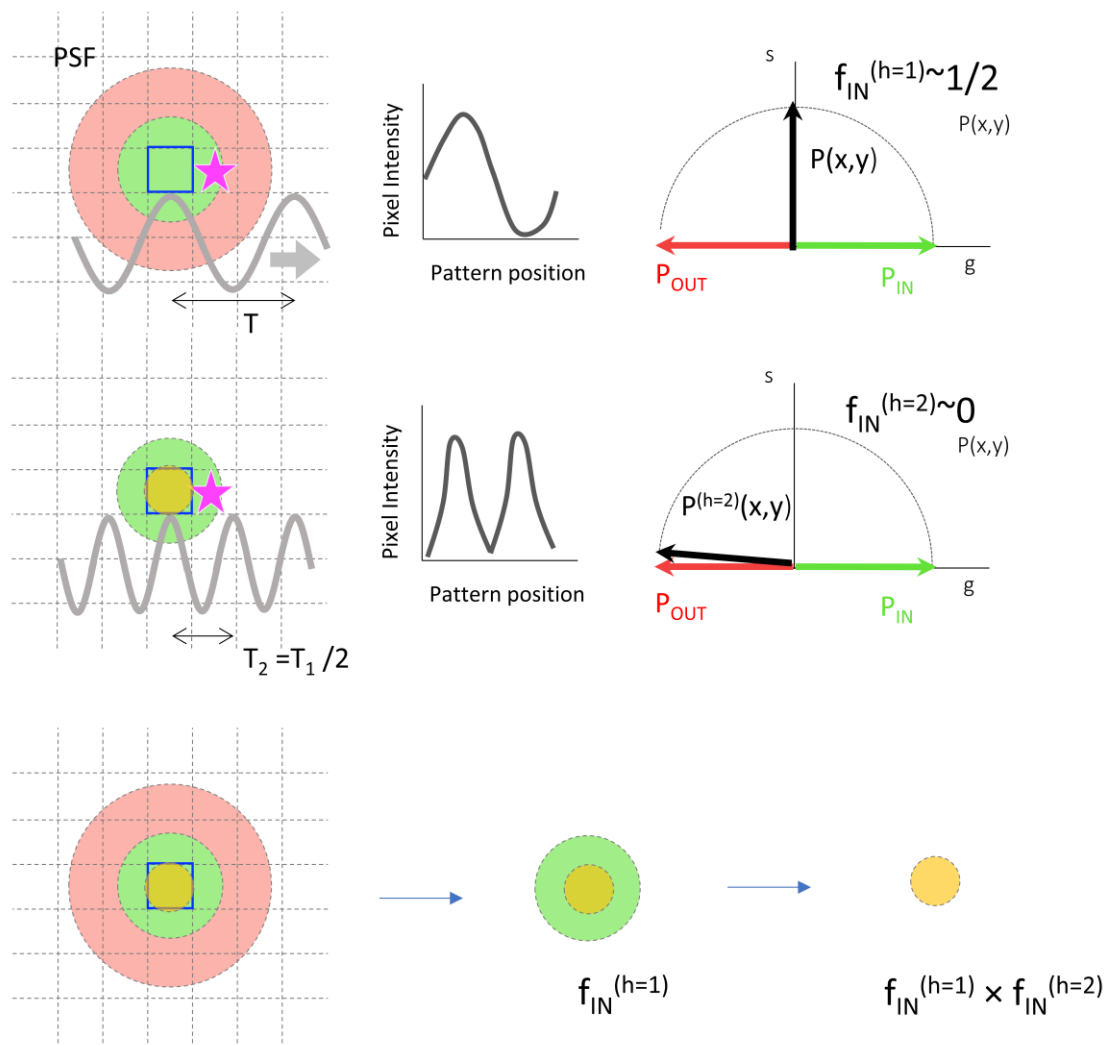

20

21 **Figure S3 | Calculation of fraction from multiple harmonics.** Schematic of the SPLIT-SIM processing using  
 22 information from two harmonics. The top row shows the calculation of the fraction  $f_{in}^{(h=1)}$  according to Eq.4 in the  
 23 Main Text. The middle row shows the calculation of the fraction  $f_{in}^{(h=2)}$  according to Eq.5 in the Main Text. The  
 24 bottom row shows the calculation of the fraction  $f_{in} = f_{in}^{(h=1)} f_{in}^{(h=2)}$  according to Eq.6 in the Main Text.

25

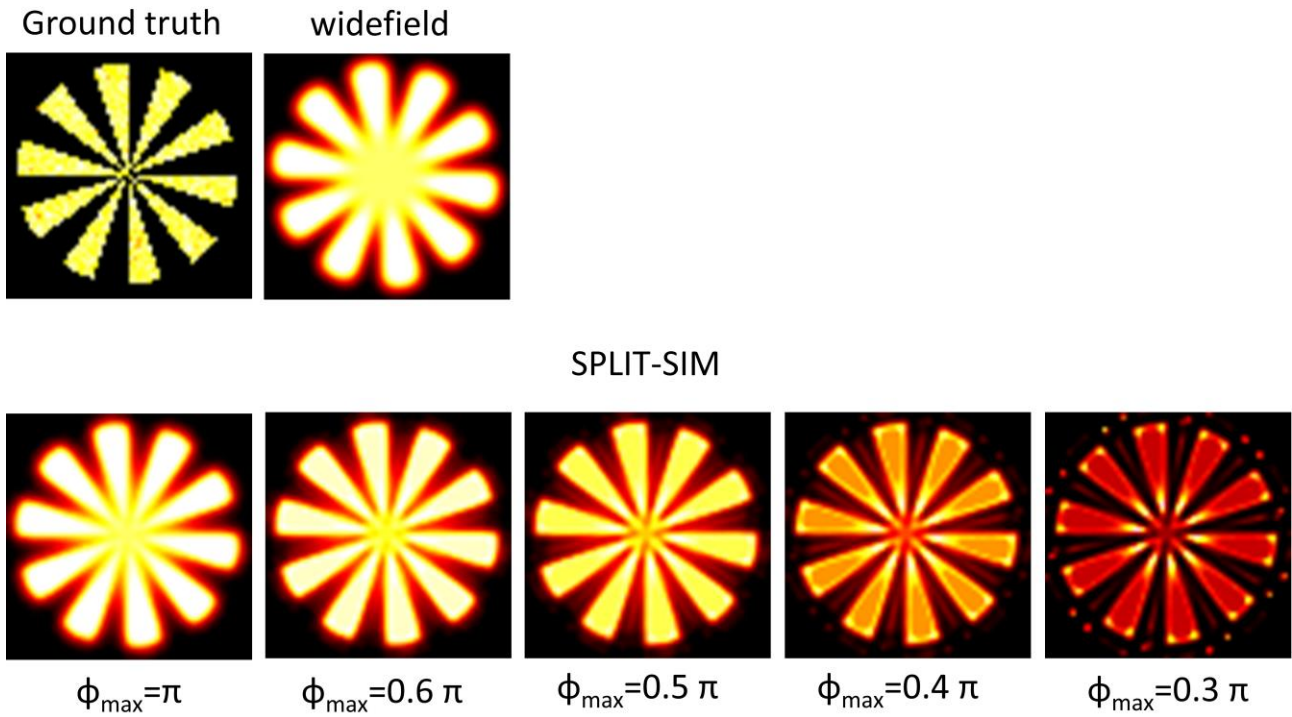

26

27 **Figure S4 | SPLIT-SIM on Siemens star.** SPLIT-SIM processing on a simulated SIM image of a Siemens star  
 28 pattern as a function of the parameter  $\phi_{\max}$ . Shown is the Siemens star object used in the simulation (Ground truth),  
 29 the widefield image (WF), the SPLIT-SIM images obtained for different values of  $\phi_{\max}$ .

30

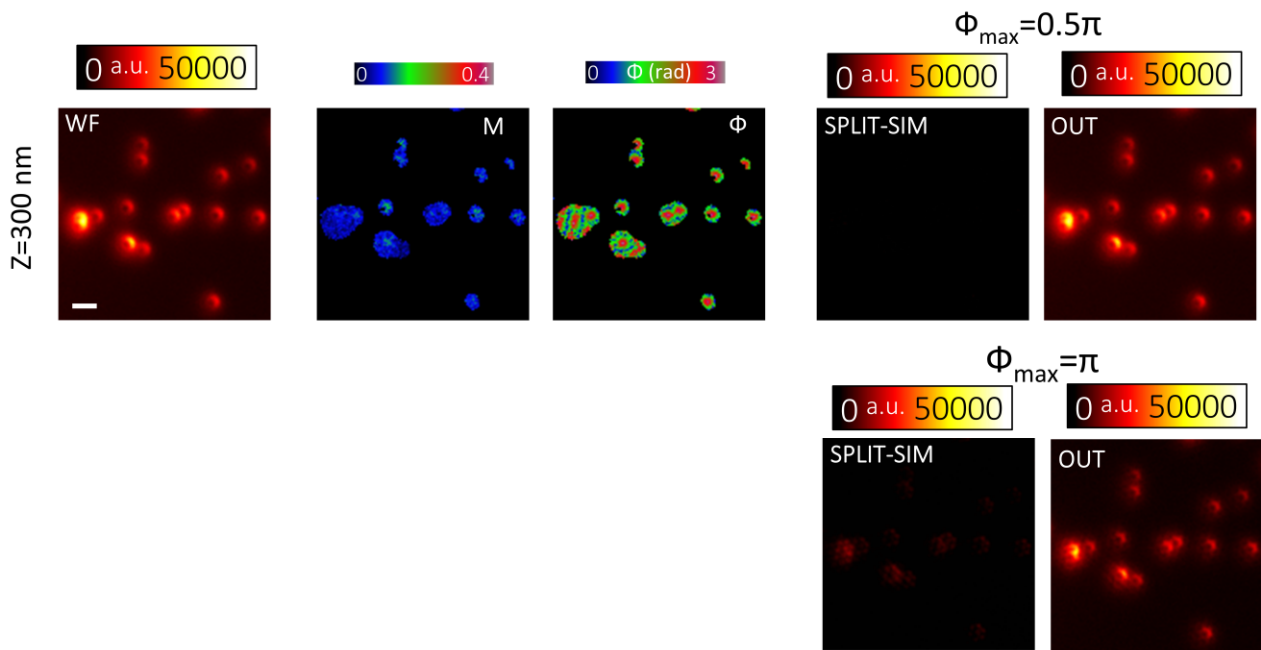

31

32 **Figure S5 | SPLIT-SIM on out-of-focus signal.** SPLIT-SIM is performed on a sample of 100-nm fluorescent spheres  
 33 (same sample of Fig.3) at an out-of-focus distance  $z=300\text{nm}$ . Shown are the widefield image (WF), the phase and  
 34 modulation images (first harmonic), the SPLIT-SIM images calculated with  $\phi_{\text{max}}=0.5\pi$  or  $\phi_{\text{max}}=\pi$ , respectively, along  
 35 with the corresponding residual components (OUT). This out-of-focus signal is correctly assigned to the OUT  
 36 component, indicating optical sectioning effect. Scale bar  $1\mu\text{m}$ .

37

38
