# Supplementary material for: Chromatin investigation in the nucleus using a phasor approach to structured illumination microscopy
Source: PubMed Central journal article supplement — Biophys J. 2021 May 1;120(12):2566–76. doi: 10.1016/j.bpj.2021.04.027 (PMC8390874; doi:10.1016/j.bpj.2021.04.027), 2021-05-01
Supplement: mmc2.pdf [file mmc2.pdf]

# Chromatin investigation in the nucleus using a phasor approach to structured illumination microscopy

Isotta Cainero,<sup>1,2</sup> Elena Cerutti,<sup>1,3</sup> Mario Faretta,<sup>4</sup> Gaetano Ivan Dellino,<sup>4,5</sup> Pier Giuseppe Pelicci,<sup>4,5</sup> Paolo Bianchini,<sup>1</sup> Giuseppe Vicidomini,<sup>6</sup> Alberto Diaspro,<sup>1,2,\*</sup> and Luca Lanzano<sup>1,3,\*</sup>

<sup>1</sup>Nanoscopia and NIC@IIT, Istituto Italiano di Tecnologia, Genoa, Italy; <sup>2</sup>Department of Physics, University of Genoa, Genoa, Italy;

<sup>3</sup>Department of Physics and Astronomy "Ettore Majorana", University of Catania, Catania, Italy; <sup>4</sup>Department of Experimental Oncology, IEO, European Institute of Oncology IRCCS, Milan, Italy; <sup>5</sup>Department of Oncology and Hemato-Oncology, University of Milan, Milan, Italy; and

<sup>6</sup>Molecular Microscopy and Spectroscopy, Istituto Italiano di Tecnologia, Genoa, Italy

**ABSTRACT** Chromatin in the nucleus is organized in functional sites at variable level of compaction. Structured illumination microscopy (SIM) can be used to generate three-dimensional super-resolution (SR) imaging of chromatin by changing in phase and in orientation a periodic line illumination pattern. The spatial frequency domain is the natural choice to process SIM raw data and to reconstruct an SR image. Using an alternative approach, we demonstrate that the additional spatial information encoded in the knowledge of the position of the illumination pattern can be efficiently decoded using a generalized version of separation of photon by lifetime tuning (SPLIT) that does not require lifetime measurements. In the resulting SPLIT-SIM, the SR image is obtained by isolating a fraction of the intensity corresponding to the center of the diffraction-limited point spread function. This extends the use of the SPLIT approach from stimulated emission depletion microscopy to SIM. The SPLIT-SIM algorithm is based only on phasor analysis and does not require deconvolution. We show that SPLIT-SIM can be used to generate SR images of chromatin organizational motifs with tunable resolution and can be a valuable tool for the imaging of functional sites in the nucleus.

**SIGNIFICANCE** Structured illumination microscopy is a popular super-resolution technique that finds application in the imaging of chromatin. We show that separation of photon by lifetime tuning can be used to reconstruct structured illumination microscopy super-resolved images via phasor analysis. This is the first demonstration, to our knowledge, that separation of photon by lifetime tuning is not limited to stimulated emission depletion microscopy but can be applied to other types of super-resolution techniques.

## INTRODUCTION

The two main approaches to super-resolution (SR) microscopy are represented by the so-called stochastic switching techniques (e.g., photoactivatable localization microscopy—PALM (1,2) and stochastic optical reconstruction microscopy—STORM (3)) and targeted switching techniques (e.g., stimulated emission depletion microscopy—STED (4) and reversible saturable optical fluorescence transitions—RESOLFT (5)). An alternative strategy is the use of an additional channel of the microscope encoding subdiffraction spatial information (6,7). In gated STED

(8,9) and separation of photons by lifetime tuning (SPLIT) (10–12), this additional channel is represented by the nanosecond fluorescence lifetime. The doughnut-shaped depletion beam causes a shortening of the fluorescence lifetime in the periphery of the point spread function (PSF), but it does not affect the fluorescence lifetime in the center of the PSF. This gradient of lifetime is used to isolate the fluorescence stemming from the center of the PSF and improve the effective resolution of the STED microscope without increasing the peak intensity of the STED beam. More specifically, in SPLIT, the fluorescence originating from the center of the PSF is extracted, at each pixel, by analyzing the profile of the intensity along the additional channel. The SPLIT computational approach allows us to mitigate the signal/noise-background reduction introduced by the time-gated detection hardware approach. Powerfully, SPLIT

Submitted December 10, 2020, and accepted for publication April 26, 2021.

\*Correspondence: [alberto.diaspro@iit.it](mailto:alberto.diaspro@iit.it) or [luca.lanzano@unict.it](mailto:luca.lanzano@unict.it)

Editor: Jochen Mueller.

<https://doi.org/10.1016/j.bpj.2021.04.027>

© 2021 Biophysical Society.

This is an open access article under the CC BY-NC-ND license (<http://creativecommons.org/licenses/by-nc-nd/4.0/>).

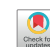

is not limited to the analysis of fluorescence lifetime but has a more general application in STED microscopy. Recently, we demonstrated that SPLIT can be applied to a series of STED images acquired with tunable depletion power (13,14). The results of this work have shown that SPLIT could be applied to any type of STED multidimensional image containing an additional channel or dimension able to encode spatial information. This suggests a more general application of SPLIT to other SR techniques. However, the application of SPLIT beyond STED has not been demonstrated yet.

Structured illumination microscopy (SIM) is one of the most implemented SR techniques (15,16). Compared with diffraction-unlimited SR techniques which can theoretically achieve unlimited spatial resolution, SIM enhances spatial resolution by a factor of two. Despite the modest twofold resolution improvement, linear SIM stands out as a more “gentle,” multicolor SR technique that can readily be applied to samples that are prepared for standard fluorescence microscopy (17). SIM relies on the use of a two-dimensional (2D) or three-dimensional (3D) structured illumination pattern, generated from the interference of two or three laser beams, respectively, to excite the sample. To achieve a uniform excitation of the sample, this pattern is sequentially shifted laterally (pattern translation steps) and tilted at different angles (pattern orientations). The images acquired at different pattern translation steps and angles are then processed to reconstruct an SR image (18). Thus, the image formation in SIM requires mathematical postprocessing of the raw data, which can easily lead to multiple artifacts during the reconstruction process (15,17,19). Several algorithms have been proposed for the reconstruction of SIM images (15,20–25). The image formation algorithm is an important step in SIM, as it allows us to extend the effective optical transfer function of the microscope beyond its cutoff spatial frequency.

Here, we present a novel, to our knowledge, point of view in the reconstruction of SIM data using the concept of SPLIT (10). We look at SIM as a multidimensional SR technique, in which additional spatial information is encoded within the different illumination pattern translation steps and angles. We show that the profile of the intensity as a function of the pattern translation steps is a fingerprint of the position of the fluorophores within the PSF of the microscope. In other words, in SIM, the pattern position represents the additional encoding channel required for the application of SPLIT. The intensity profile along this channel can be visualized and analyzed in the phasor plot, which contains the Fourier transform (FT) of the profile at each pixel of an image (26–28). In SIM, we find that the center and the periphery of the PSF have different fingerprints in the phasor plot. This difference can be used to calculate the fraction of the total signal (i.e., the sum of all the images acquired at different translation steps and angles) corresponding to the center of the PSF and reconstruct a final SIM image with higher spatial resolution. The combination of SPLIT and SIM (SPLIT-SIM)

is a powerful technique because it can reconstruct artifact-free images and because the phasor plot provides a visual, intuitive, and direct evaluation of the acquired data to non-skilled users as well. We show that the resolution in the focal plane can be tuned up to a factor of  $\sim 2$  by changing the value of a single parameter and without the use of deconvolution. As a benchmark for biological applications, we apply our method to the imaging of chromatin. Chromatin organization plays a key role in the regulation of genome-related processes and SR microscopy has become fundamental to understand how chromatin 3D structure influences genome function. We quantify the colocalization of functional nuclear sites at two different spatial scales by dual-color SPLIT-SIM. This work demonstrates for the first time, to our knowledge, that SPLIT is not limited to STED microscopy but has a more general application in the context of SR techniques and opens new perspectives in the context of SIM microscopy and related optical methods.

## MATERIALS AND METHODS

### Simulations

SIM images of point-like fluorophores were simulated using MATLAB (The MathWorks, Natick, MA). The object consisted of a variable number of point-like sources randomly distributed in an image of  $128 \times 128$  pixels with a pixel size of 50 nm. The Siemens star object was simulated in MATLAB using the function `im_radial_stripe` (29).

A periodic illumination pattern  $I_{\alpha_j}(x, y, k)$  was simulated as

$$I_j(x, y, k) = 1 - m \sin^2 \left[ h\pi \left( \frac{x \cos \alpha_j - y \sin \alpha_j}{T} + \frac{k}{N_{\text{steps}}} + p_{j,h} \right) \right], \quad (1)$$

where  $m$  is a constant between 0 and 1 (with 1 representing the maximal contrast),  $\alpha_j$  is the orientation of the pattern ( $j = 1, \dots, N_{\text{angles}}$  with  $N_{\text{angles}} = 3$ ),  $T$  is the period,  $p_{j,h}$  is the offset of the pattern at the orientation  $\alpha_j$ ,  $h$  is a constant indicating the first ( $h = 1$ ) or second ( $h = 2$ ) order of the pattern. For the simulations shown in Fig. 2 and Fig. S4,  $h$  was set to 1. The contrast of the pattern  $C_p$  is defined as the amplitude divided by the average, and its relation to the parameter  $m$  is given by  $C_p = (m/2)/(1 - m/2)$ . The orientation of the pattern was set to the values  $\alpha_1 = 2.895$  rad,  $\alpha_2 = \alpha_1 + \pi/3$ , and  $\alpha_3 = \alpha_1 + 2\pi/3$ . The period was set to  $T = 450$  nm unless specified otherwise. The position of the pattern was translated by varying the value of  $k$  between 1 and  $N_{\text{steps}}$  with  $N_{\text{steps}} = 5$ . For each image of the stack, the object image was multiplied by the excitation pattern  $I_{\alpha_j}(x, y, k)$  and then convolved with a Gaussian detection PSF of waist  $w_{\text{WF}} = 4.5$  pixels = 225 nm. The maximal collectable number of photons in a single pixel from a point-like source, for each frame of the stack, was set to the value  $S$ . Finally, the images were corrupted by a Poisson noise realization whose average values are given by the number of counts at each pixel using the MATLAB function `imnoise`.

### SPLIT-SIM algorithm

The SPLIT-SIM algorithm was implemented in MATLAB. The algorithm operates on SIM image stacks  $F_j(x, y, k)$  consisting of  $N_{\text{angles}}$  orientations and  $N_{\text{steps}}$  pattern translation steps. For each orientation  $\alpha_j$ , the phasor  $\mathbf{P}_{\text{FL},j}(x, y)$  is calculated via an FT according to Eq. 3. The phase  $\phi_{\text{FL},j}(x, y)$  and modulation  $M_{\text{FL},j}(x, y)$  are then calculated as the phase and the modulus of  $\mathbf{P}_{\text{FL},j}(x, y)$ .

For each harmonic, a periodic pattern  $I_j(x, y, k)$  is simulated according to Eq. 1 by setting the period to  $T = T_{\text{est}}$ , the orientation angle to  $\alpha_j = \alpha_{j,\text{est}}$ , and the pattern offset to  $p_{j,h} = p_{j,h,\text{est}}$ . The values  $T_{\text{est}}$ ,  $\alpha_{j,\text{est}}$ , and  $p_{j,h,\text{est}}$  represent the best estimation of the parameters describing the experimental illumination pattern. The phasor of the excitation intensity  $\mathbf{P}_{\text{exc},j}(x, y)$  is calculated as

$$\mathbf{P}_{\text{exc},j}(x, y) = \sum_k I_j(x, y, k) e^{i[2\pi h(k-1)/N_{\text{steps}}]} / \sum_k I_j(x, y, k) \quad (2)$$

The phase  $\phi_{\text{exc},j}(x, y)$  is then calculated as the phase of  $\mathbf{P}_{\text{exc},j}(x, y)$ . The corrected phasor  $\mathbf{P}_j(x, y)$  is calculated according to Eq. 4. This procedure is repeated for  $j = 1, \dots, N_{\text{angles}}$ . The average phasor  $\mathbf{P}(x, y)$  (average of the  $N_{\text{angles}}$  orientations) is calculated using Eq. 5.

The phase image  $\phi(x, y)$ , calculated as the phase of  $\mathbf{P}(x, y)$ , is used to estimate the illumination pattern parameters. The values  $T_{\text{est}}$  (pattern period),  $\alpha_{j,\text{est}}$  (orientation angles), and  $p_{j,1,\text{est}}$  (first-order offsets) are first estimated as the values that minimize the average value of the first harmonic phase in an image,  $\phi_{\text{AV}} = \langle \phi(x, y) \rangle$ , where the brackets denote averaging over all nonbackground pixels. The offset of the second order,  $p_{j,2,\text{est}}$ , can be expressed as  $p_{j,2,\text{est}} = p_{j,1,\text{est}} + \Delta p_{j,2,\text{est}}$ , where  $\Delta p_{j,2,\text{est}}$  is dependent on the shape of the pattern. The values  $\Delta p_{j,2,\text{est}}$  are estimated as the value that minimizes the average value of the second-order phase in an image,  $\phi^{(h=2)}_{\text{AV}} = \langle \phi^{(h=2)}(x, y) \rangle$ . To speed up processing, the values of  $T_{\text{est}}$ ,  $\alpha_{j,\text{est}}$ , and  $\Delta p_{j,2,\text{est}}$  are calibrated (using a sample of 100-nm fluorescent spheres) and stored in a file. In this way, for any given sample, we must estimate only the parameters  $p_{j,1,\text{est}}$ .

Phasor plots were built as 2D histograms of the values  $g(x, y) = M(x, y) \cos \phi_{\text{plot}}(x, y)$  and  $s(x, y) = M(x, y) \sin \phi_{\text{plot}}(x, y)$  where  $\phi_{\text{plot}}(x, y) = |\phi(x, y)|$  and  $M(x, y)$  and  $\phi(x, y)$  are the modulation and phase of the phasor  $\mathbf{P}(x, y)$ .

For each pixel, the fraction of photons corresponding to the center of the PSF  $f_{\text{IN}}(x, y)$  was calculated using Eqs. 6, 7, and 8 (experimental data) or only Eq. 6 (simulations). For the experimental data, the parameter  $M_{\text{max}}$ , which depends on the contrast of the experimental pattern, was determined by imaging a sample of sparse 100-nm fluorescent spheres. The parameter  $\phi_{\text{max}}$  was set as specified. To force values of fraction to fall between 0 and 1, the values of  $f_{\text{IN}}(x, y)$  were filtered through a logistic function:  $f = 1/(1 + \exp(-k_L(f - 1/2)))$  with  $k_L = 4$ . The super-resolved SPLIT-SIM image was calculated using Eq. 9. The residual fraction of photons corresponding to the periphery of the PSF was calculated as  $f_{\text{OUT}}(x, y) = 1 - f_{\text{IN}}(x, y)$ , and the corresponding image was calculated as  $I_{\text{OUT}}(x, y) = f_{\text{OUT}}(x, y) I_{\text{WF}}(x, y)$ , where  $I_{\text{WF}}(x, y)$  is the sum of all the images of the stack,  $I_{\text{WF}}(x, y) = \sum_{j,k} F_j(x, y, k)$ .

A user-friendly version of the algorithm is available at <https://github.com/llanzano/SPLITSIM>.

## Data analysis

Image correlation spectroscopy (ICS) and image cross-correlation spectroscopy (ICCS) analyses were performed in MATLAB using the algorithm described in Oneto et al. (30) and available at <https://github.com/llanzano/ICCS>. ICCS was used to quantify the spatial resolution of the images. Spatial autocorrelation functions (ACFs) were fitted to a Gaussian model to extract the average width of the effective PSF expressed as full width at half maximum (FWHM) (31). ICCS was used to quantify the colocalization of nuclear sites from dual-color SPLIT-SIM images and to extract characteristic correlation distances.

## Samples

A sample of 100-nm fluorescent spheres (yellow-green FluoSpheres Carboxylate-Modified Microspheres, F8803; Invitrogen, Carlsbad, CA) was prepared as follows. Glass coverslips were treated with poly-L-lysine

(P8920; Sigma-Aldrich, St. Louis, MO) for 20 min at room temperature (RT), and the spheres, diluted in Milli-Q water by 1:10,000 v/v, were added onto the coverslips. After 10 min, the coverslips were washed with Milli-Q water, dried under nitrogen flow, and mounted overnight with Invitrogen ProLong Diamond Antifade Mounting Medium (P36965).

HeLa cells and MCF7 cells were grown in Dulbecco's modified Eagle's medium (Sigma-Aldrich) supplemented with 1% penicillin/streptomycin, and 10% fetal bovine serum (ECS0180L; Euroclone, Pero, Italy). Cells were grown in their flasks and then transferred to 14-mm glass coverslips, 1.5 high precision for imaging. HeLa cells were fixed for 10 min with 100% ethanol at  $-20^\circ\text{C}$ , then washed three times in phosphate-buffered saline (PBS) and twice in 3% BSA for 5 min. Next, they were incubated for 1 h RT in Sigma-Aldrich normal goat serum (NS02L) with 0.2% Sigma-Aldrich Triton 100 $\times$  in PBS. Immunostaining of H2B histone was performed with Abcam rabbit anti-histone H2B antibody, ChIP Grade (ab1790; Abcam, Cambridge, UK), 1:500 diluted, in 5% normal goat serum for 2 h. Upon incubation, the sample was washed for 15 min in 5% normal goat serum with 0.2% Triton, then twice for 15 min in 0.6% normal goat serum with 0.05% Triton 100 $\times$  in PBS. The secondary antibodies, goat anti-mouse IgG H&L (Chromo 488) (ab60314), 1/200 diluted, were incubated for 1 h at RT in 5% normal goat serum. Then, the sample was washed for 15 min in 5% normal goat serum with 0.2% Triton and twice for 15 min in 0.6% normal goat serum with 0.05% Triton 100 $\times$ .

To label replication sites, nascent DNA was detected in MCF7 by incubation with 5-ethynyl-2'-deoxyuridine (EdU) at  $37^\circ\text{C}$  for 25 min with 10  $\mu\text{M}$  EdU (Thermo Fisher Scientific, Waltham, MA; Invitrogen). Later on, cells were fixed with 4% paraformaldehyde (w/v) for 10 min at RT, then washed twice with BSA 3% and permeabilized with 0.5% Triton 100 $\times$  for 20 min. EdU detection was performed using the Click-iT EdU imaging kit (Thermo Fisher Scientific) according to the manufacturer's instructions, using Alexa azide 488. After 1 h blocking buffer (BB) (3% Sigma-Aldrich bovine serum albumin (BSA) and 0.5% Triton 100 $\times$ ) incubation at RT, immunostaining of the proliferating cell nuclear antigen (PCNA) was performed overnight at  $4^\circ\text{C}$  with the primary antibody Chromotek rat anti-PCNA (16D10; Planegg-Martinsried, Germany) in BB (1/2000 dilution), and then the sample was washed once in BB and twice in washing buffer (WB) (0.2% BSA and 0.05% Triton 100 $\times$ ). Next, cells were incubated with the secondary antibody anti-rat ATTO 594 in BB for 1 h at RT and then washed once in BB, twice in WB, and thrice in PBS.

As a negative control, we stained elongating RNA polymerases (RNA-pol2) and a marker of packed DNA, histone H3K9me2. Cells were treated for 1 h RT in BB, then incubated overnight with Abcam rabbit anti-RNA-pol2ser2 (ab5095), in BB (1/500 dilution), and Abcam mouse anti-H3K9me2 (ab1220). Upon incubation, cells were washed as previously. Next, cells were incubated 1 h RT with secondary antibodies anti-rabbit ATTO 594 in BB (1/500 dilution) and anti-mouse Alexa 488 (1/1000 dilution) and then washed once in BB, twice in WB, and thrice in PBS.

All samples were mounted overnight with Invitrogen ProLong Diamond Antifade Mounting Medium (P36965).

## Experiments

All the measurements were performed on a Nikon N-SIM Super-Resolution microscope equipped with a 1.49 NA 100 $\times$  objective (CFI Apo TIRF 100 $\times$ c Oil; Nikon, Tokyo, Japan) and with the grating block suitable for our experiments, 3D EX V-R 100 $\times$ /1.49. Excitation was provided by a standard four laser unit (405, 488, 561, 640 nm). Alexa 488 and Chromo 488 excitation was performed at 488 nm and the emission was collected between 515 and 545 nm. ATTO 594 was excited at 561, and its emission was detected at 590–640 nm.

## Data availability

The data that support the findings of this study are available on request from the corresponding author.

## RESULTS

## The SPLIT method in structured illumination microscopy

To apply SPLIT, we must demonstrate that SIM is a multi-dimensional, SR technique with additional spatial information encoded into an additional channel. In a conventional widefield (WF) microscope, two fluorophores that are closer than the diffraction limit cannot be distinguished. In other words, in WF, the intensity at any given pixel is always

given by a mixed contribution of fluorophores centered with the pixel position (center of the PSF) and fluorophores that are located far from the pixel position but within the PSF (periphery of the PSF) (Fig. 1 *a*). In SIM, the sample is excited sequentially with a varying illumination pattern. This varying illumination pattern encodes additional spatial information on the position of the fluorophores within the diffraction-limited PSF. We can show that a fluorophore located in the center of the PSF has a different fingerprint than a fluorophore located at the periphery of the PSF

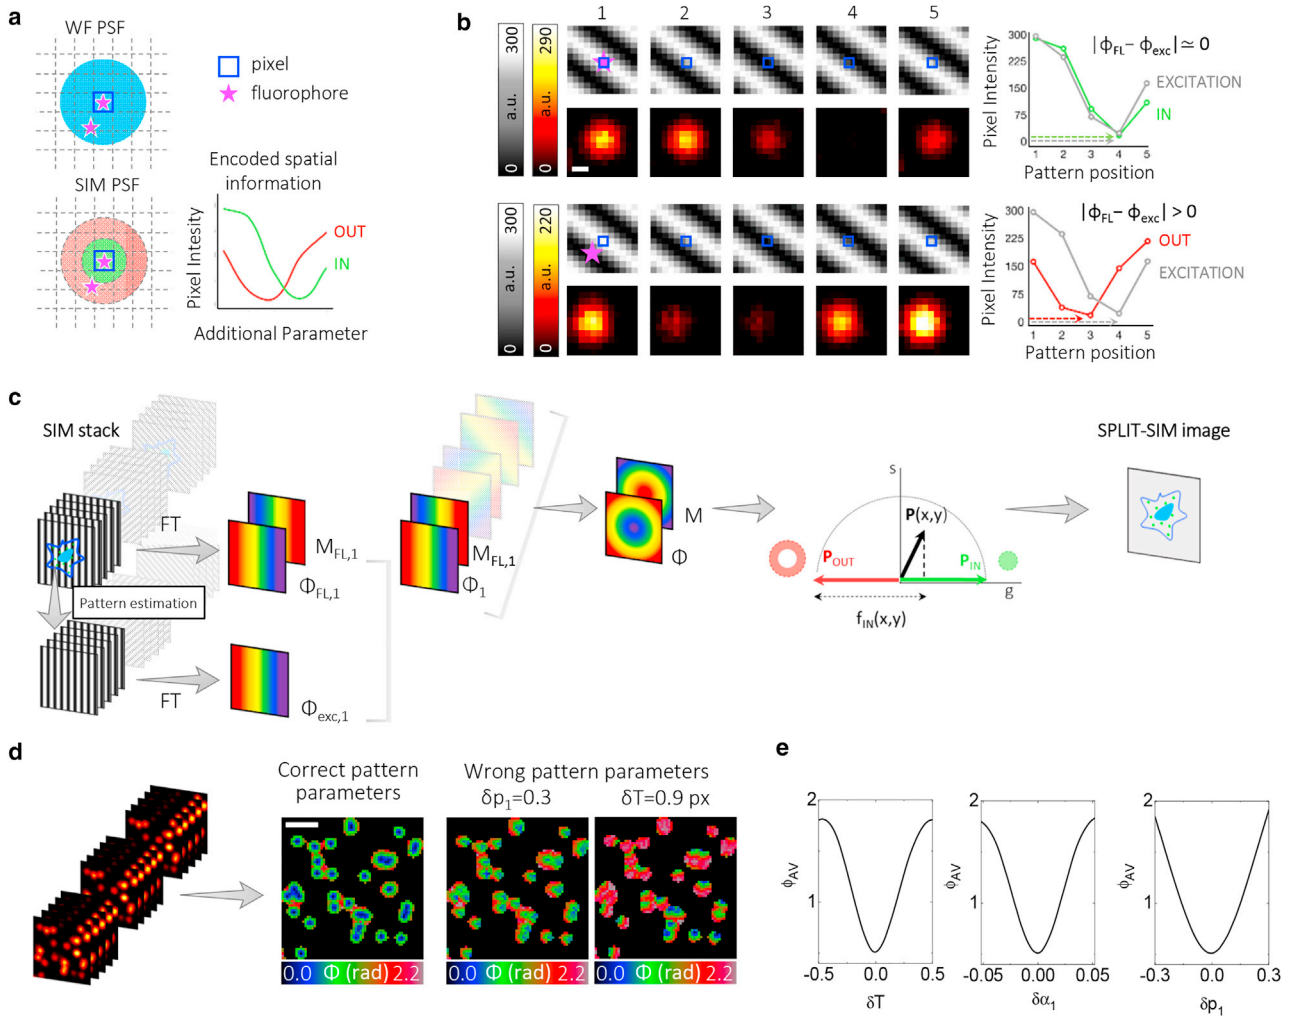

FIGURE 1 Description of the SPLIT-SIM method. (*a*) Schematic comparison between the widefield (WF) diffraction-limited point spread function (PSF) and the SIM PSF, which contains subdiffraction spatial information encoded into an additional channel. (*b*) Simulated SIM images for a point-like fluorophore (pink star) centered with the central pixel (top) and far from the central pixel (bottom). Shown are the images of the illumination pattern shifting in one direction (grayscale) and the corresponding fluorescence image (red heat scale). The intensity of the central pixel as a function of the position of the pattern is shown in the far right: when the fluorophore is centered with the central pixel, the fluorescence intensity (IN) is similar to the intensity of the illumination (EXCITATION) whereas when the fluorophore is far from the central pixel, the fluorescence intensity (OUT) shows a different behavior in respect to the illumination intensity. Scale bars, 200 nm. (*c*) Schematic workflow of the SPLIT-SIM algorithm, from the SIM image acquisition stack to the formation of the SPLIT-SIM image: calculation of a modulation and phase image for each orientation of a SIM stack, pattern parameter estimation, calculation of the average phase and modulation images, decomposition in the phasor plot, and reconstruction of the super-resolved image. (*d*) Simulated SIM image stack and corresponding phase images calculated with the correct pattern parameters, with a wrong value of the offset of the first angle ( $\delta p_1 = 0.3$ ) and with a wrong value of the period ( $\delta T = 0.9$  px), respectively. Scale bars, 1  $\mu$ m. (*e*) Representations of the average phase value ( $\phi_{AV}$ ) as a function of the period (T), the first orientation angle ( $\alpha_1$ ), and the offset of the first angle ( $p_1$ ). The setting of “correct” pattern parameters minimizes the average value of the phase ( $\phi_{AV}$ ). To see this figure in color, go online.



when the intensity is plotted as a function of a parameter that defines a variation of the illumination pattern (Fig. 1 a).

This point is made clearer with the simulation shown in Fig. 1 b. A typical SIM illumination pattern is simulated as a sinusoidal pattern shifting its peak position along one direction with five translation steps. The moving pattern generates, at each pixel, a sinusoidal excitation intensity as a function of the pattern position. At a given pixel, this excitation profile is a sine wave characterized by a phase  $\phi_{\text{exc}}$ . The profile of the fluorescence intensity from the same pixel, as a function of the pattern position, is very different depending on whether the fluorophore is centered with that pixel (IN) or is shifted along the direction of the pattern (OUT) (Fig. 1 b, right). In the first case, the fluorescence intensity profile has a phase  $\phi_{\text{FL}}$  similar to the phase  $\phi_{\text{exc}}$  of the excitation profile ( $\phi = |\phi_{\text{FL}} - \phi_{\text{exc}}| \simeq 0$ ). In the second case, the fluorescence intensity profile has a phase  $\phi_{\text{FL}}$  which is different from that of the excitation profile  $\phi_{\text{exc}}$  ( $\phi = |\phi_{\text{FL}} - \phi_{\text{exc}}| > 0$ ). Thus, the profile of the intensity as a function of the pattern position is a fingerprint of the location of the fluorophores within the PSF of the microscope.

The workflow of the SPLIT-SIM algorithm is depicted schematically in Fig. 1 c. The starting point is a SIM stack consisting of a total number of images  $N_{\text{images}} = N_{\text{steps}} \times N_{\text{angles}}$ , corresponding to  $N_{\text{angles}}$  orientations of the illumination pattern and  $N_{\text{steps}}$  pattern translation steps for each orientation. For each orientation,  $\alpha_j$  ( $i = 1, \dots, N_{\text{angles}}$ ), we have a substack  $F_j(x, y, k)$  consisting of  $N_{\text{steps}}$  images. The algorithm performs an FT on this substack along the third dimension to obtain the phasor  $\mathbf{P}_{\text{FL},j}$ :

$$\mathbf{P}_{\text{FL},j}(x, y) = \sum_k F_j(x, y, k) e^{i[2\pi h(k-1)/N_{\text{steps}}]} \Big/ \sum_k F_j(x, y, k), \quad (3)$$

where  $h$  represents the harmonic frequency number. The phasor  $\mathbf{P}_{\text{FL},j}(x, y)$  has phase  $\phi_{\text{FL},j}(x, y)$  and modulation  $M_{\text{FL},j}(x, y)$ . The excitation profile has a phase  $\phi_{\text{exc},j}(x, y)$  that depends on the pixel position and on the specific illumination pattern parameters. As explained in Fig. 1 b, we need to calculate  $\phi_j = \phi_{\text{FL},j} - \phi_{\text{exc},j}$ . The algorithm finds the unknown  $\phi_{\text{exc},j}(x, y)$  via an iterative procedure, which, for the sake of clarity, is described in the [Materials and methods](#). Thus, for the each orientation, we get the modulation  $M_{\text{FL},j}(x, y)$  and the corrected phase  $\phi_j(x, y)$ . The corrected phasor is defined as

$$\mathbf{P}_j(x, y) = \mathbf{P}_{\text{FL},j}(x, y) e^{-i\phi_{\text{exc},j}(x, y)} \quad (4)$$

This calculation is performed on each of the substacks corresponding to the  $N_{\text{angles}}$  orientations.

The average phasor is then calculated as

$$\mathbf{P}(x, y) = \sum_j \mathbf{P}_j(x, y) / N_{\text{angles}} \quad (5)$$

The phasor  $\mathbf{P}(x, y)$  can be used to generate a super-resolved image. This is done by decomposing the phasor into a component corresponding to the center of the PSF,  $\mathbf{P}_{\text{IN}}$ , and a component corresponding to the periphery of the PSF,  $\mathbf{P}_{\text{OUT}}$ . For each pixel, the fraction of the total intensity corresponding to the center of the PSF is given by

$$f_{\text{in}}^{(h=1)}(x, y) = (\mathbf{P}_{\text{out}} - \mathbf{P}(x, y)) \cdot (\mathbf{P}_{\text{out}} - \mathbf{P}_{\text{in}}) / |\mathbf{P}_{\text{out}} - \mathbf{P}_{\text{in}}|^2 \quad (6)$$

The value of  $f_{\text{in}}$  is proportional to the distance between the phasor  $\mathbf{P}$  and the phasor  $\mathbf{P}_{\text{out}}$  along the line connecting  $\mathbf{P}_{\text{in}}$  and  $\mathbf{P}_{\text{out}}$ . To understand this formula, consider first the phasors associated to single fluorophores located at a different distance from the center of the PSF (Fig. S1). If the fluorophore is in the center, the phasor has phase  $\phi = 0$  and thus  $f_{\text{in}} \sim 1$ . If the fluorophore is at a distance  $d = T/2$ , where  $T$  is the period of the illumination pattern, the phasor has phase  $\phi = \pi$ , and thus,  $f_{\text{in}} \sim 0$ . Note that if the fluorophore is at a distance  $d = +d_0$  or  $d = -d_0$  from the center, the formula yields the same value. This is guaranteed by the choice of  $\mathbf{P}_{\text{IN}}$  ( $\phi = 0$ ) and  $\mathbf{P}_{\text{OUT}}$  ( $\phi = \pi$ ), parallel to the horizontal axis. Note that with  $\mathbf{P}_{\text{IN}}$  and  $\mathbf{P}_{\text{OUT}}$  being linearly dependent, it is not possible in SPLIT-SIM to isolate a third background component as in the lifetime-based SPLIT-STED approach (10). In general, the PSF will contain multiple fluorophores, and the resulting phasor will be the linear combination of the phasors of the single fluorophores (Fig. S2).

Spatial information related to the second order of the illumination pattern is contained in the phasor  $\mathbf{P}^{(h=2)}(x, y)$  calculated at harmonic number  $h = 2$  (Eq. 3). This phasor is used to extract a fraction  $f_{\text{in}}^{(h=2)}(x, y)$  using

$$f_{\text{in}}^{(h=2)}(x, y) = (\mathbf{P}_{\text{out}} - \mathbf{P}^{(h=2)}(x, y)) \cdot (\mathbf{P}_{\text{out}} - \mathbf{P}_{\text{in}}) / |\mathbf{P}_{\text{out}} - \mathbf{P}_{\text{in}}|^2 \quad (7)$$

The information from both harmonics is then combined using the following formula:

$$f_{\text{in}}(x, y) = f_{\text{in}}^{(h=1)}(x, y) f_{\text{in}}^{(h=2)}(x, y) \quad (8)$$

To understand this formula, consider the schematic reported in Fig. S3. For the harmonic  $h = 2$ , the period of the pattern is  $T_2 = T/2$ . Thus, the phasor  $\mathbf{P}_{\text{OUT}}$  corresponds now to a distance from the center  $T_2/2 = T/4$ . In other words, the second harmonic phasor provides spatial information on a finer scale. Using Eq. 6, we calculate the fraction of the signal corresponding to the center of the PSF. Using Eq. 8, we calculate the fraction of this fraction corresponding to a more central region.

The final super-resolved image is obtained as

$$I_{\text{IN}}(x, y) = f_{\text{IN}}(x, y)I_{\text{WF}}(x, y), \quad (9)$$

where  $I_{\text{WF}}(x, y)$  is the sum of the intensity of all the images of the stack.

In summary, the additional spatial information encoded in the phasor  $\mathbf{P}(x, y)$  is used to improve the spatial resolution of the SIM system. It is worth noting that the phase  $\phi(x, y)$  is dependent on a proper estimation of the pattern parameters. Fig. 1 *d* shows a simulation of SIM data with a known sinusoidal illumination pattern. The pattern is fully characterized by a period  $T$ , three orientation angles  $\alpha_k$ , and three values for the offset of the initial position  $p_k$ . The use of “wrong” pattern parameters can be revealed by the calculated phase image  $\phi(x, y)$  (Fig. 1 *d*). We find that the “correct” pattern minimizes the average value of the phase of an image,  $\phi_{\text{AV}}$  (Fig. 1 *e*). Thus, the minimization of the value  $\phi_{\text{AV}}$  can be used to estimate the parameters of an unknown illumination pattern.

### Phasor plot representation of SIM data

We tested our SPLIT-SIM algorithm on simulated 2D SIM data (Fig. 2). SIM image stacks were generated using a sinusoidal illumination pattern (Fig. 2, *a* and *b*) with  $N_{\text{angles}} = 3$  orientations and  $N_{\text{steps}} = 5$  translation steps. Images of sparse particles were generated under different conditions of illumination contrast and level of photon counts (Fig. 2, *d–g*). The first image (Fig. 2 *d*) is obtained with a maximal contrast of the illumination pattern ( $C_p = 1$ ) and a very high level of photon counts ( $S = 500$ ). The resulting phasor plot, i.e., the 2D histogram of the values  $g = M\cos\phi$  and  $s = M\sin\phi$  of all the pixels of the image, is approximated by an arc that spans the first quadrant. Note that for the purpose of visualization, phasors are only shown with positive phase values ( $0 < \phi_{\text{plot}} < \pi$ ) by setting  $\phi_{\text{plot}} = |\phi|$ . The points with  $\phi = 0$  correspond to the center of the PSF, whereas the points with larger values of  $\phi$  correspond to the periphery of the PSF. The modulation  $M$  is roughly constant across the PSF and equal to the value  $M_{\text{max}} = 0.5$ . This value depends on the contrast of the illumination pattern  $C_p$ . In fact, if the contrast is reduced to  $C_p = 0.33$ , the modulation is reduced to the value  $M_{\text{max}} = 0.16$  (Fig. 2 *f*). Thus, the radius of the arc formed by the phasor, in the case of sparse structures, is a measure of the contrast of the illumination pattern. For images simulated with lower photon counts ( $S = 5$ ), the arc formed by the phasor spreads because of the presence of a higher level of Poisson noise, which casts uncertainty on the values of  $M$  and  $\phi$  (Fig. 2, *e* and *g*). The effect of noise is also visible in the corresponding phase and modulation images. For crowded samples, the value of modulation is generally lower than the value  $M_{\text{max}}$  and we cannot detect the characteristic arc-shaped phasor (Fig. 2 *h*).

The determination of  $M_{\text{max}}$  is important for setting the positions of  $\mathbf{P}_{\text{in}}$  and  $\mathbf{P}_{\text{out}}$ . We can set the position of the phasor

corresponding to the center of the PSF as  $\mathbf{P}_{\text{in}} = M_{\text{max}}\exp(i\phi_{\text{in}})$ , with  $\phi_{\text{in}} = 0$ , and the position of the phasor corresponding to the periphery of the PSF as  $\mathbf{P}_{\text{out}} = M_{\text{max}}\exp(i\phi_{\text{out}})$ , with  $\phi_{\text{out}} = \pi$  (Fig. 2 *c*, *top*). Because all phasors have  $M \leq M_{\text{max}}$ , this choice only yields values of the fraction  $f_{\text{IN}}$  between 0 and 1 (Fig. 2 *c*, *top*). Instead, if we set  $\mathbf{P}'_{\text{out}} = M'\exp(i\phi_{\text{out}})$ , with  $\phi_{\text{out}} = \pi$  and  $M' = M_{\text{max}}\cos(-\phi_{\text{max}})$ , where  $\phi_{\text{max}}$  is a tunable parameter, Eq. 6 can now yield also negative values of the fraction  $f_{\text{IN}}$  (Fig. 2 *c*, *bottom*). In this case, we force the values of the fraction to fall between 0 and 1 through a nonlinear filter (see [Materials and methods](#)). This second choice provides a better improvement of spatial resolution but can potentially introduce artifacts in the reconstructed SPLIT-SIM image. We evaluated the effects of using different values of  $\phi_{\text{max}}$  on a simulated Siemens star pattern (Fig. S4). We see that the appearance of artifacts is evident for values  $\phi_{\text{max}} < 0.5\pi$ . Thus, we set the value  $0.5\pi$  as a lower limit for the parameter  $\phi_{\text{max}}$ .

### SPLIT-SIM provides SR without deconvolution

We then tested our SPLIT-SIM algorithm on 3D SIM images of fluorescent spheres acquired on a Nikon N-SIM microscope. Fig. 3 *a* shows a representative image of a sample of 100-nm fluorescent beads, at the plane  $z = 0$  nm. The beads are sparse enough to show the characteristic phasor arc (Fig. 3, *b* and *c*). We show the two phasor plots corresponding to the first and second harmonic frequencies of the FT, respectively. The values of  $M_{\text{max}}$  in the two harmonics are  $M_{\text{max}} = 0.39$  and  $M_{\text{max}} = 0.27$ , respectively, corresponding to a different contrast of the first and second order of the pattern. The phasor “arc” of the second harmonic spans a wider angle, in keeping with the fact that it contains spatial information at a higher frequency, also visible in the corresponding phase image (Fig. 3 *c*). We performed SPLIT by using information from both harmonics, by setting  $\phi_{\text{max}} = 0.5\pi$  (Fig. 3 *d*). We estimated the resolution of the SPLIT-SIM image by ICS (30). The ACFs of the SPLIT and WF images yield a resolution given by  $\text{FWHM}_{\text{SPLIT}} = 130$  nm and  $\text{FWHM}_{\text{WF}} = 282$  nm, corresponding to a  $\sim 2$ -fold improvement of spatial resolution of SPLIT with respect to WF.

The SPLIT-SIM image is compared with a reconstruction processed with the manufacturer’s software (NIS image) (Fig. 3 *e*). For the NIS image, we obtain  $\text{FWHM}_{\text{NIS}} = 156$  nm. It is worth noting that our result is obtained without any deconvolution step. However, we note that the twofold improvement is obtained only by setting  $\phi_{\text{max}} = 0.5\pi$ . Indeed, if we set  $\phi_{\text{max}} = \pi$ , we obtain for the SPLIT image  $\text{FWHM}_{\text{SPLIT}} = 210$  nm, corresponding to only a modest  $\sim 1.3$ -fold improvement of spatial resolution (data not shown).

We also note that the phasor decomposition provides optical sectioning. Fig. S5 shows an image of the same sample of fluorescent spheres at the plane  $z = 300$  nm. In this case,

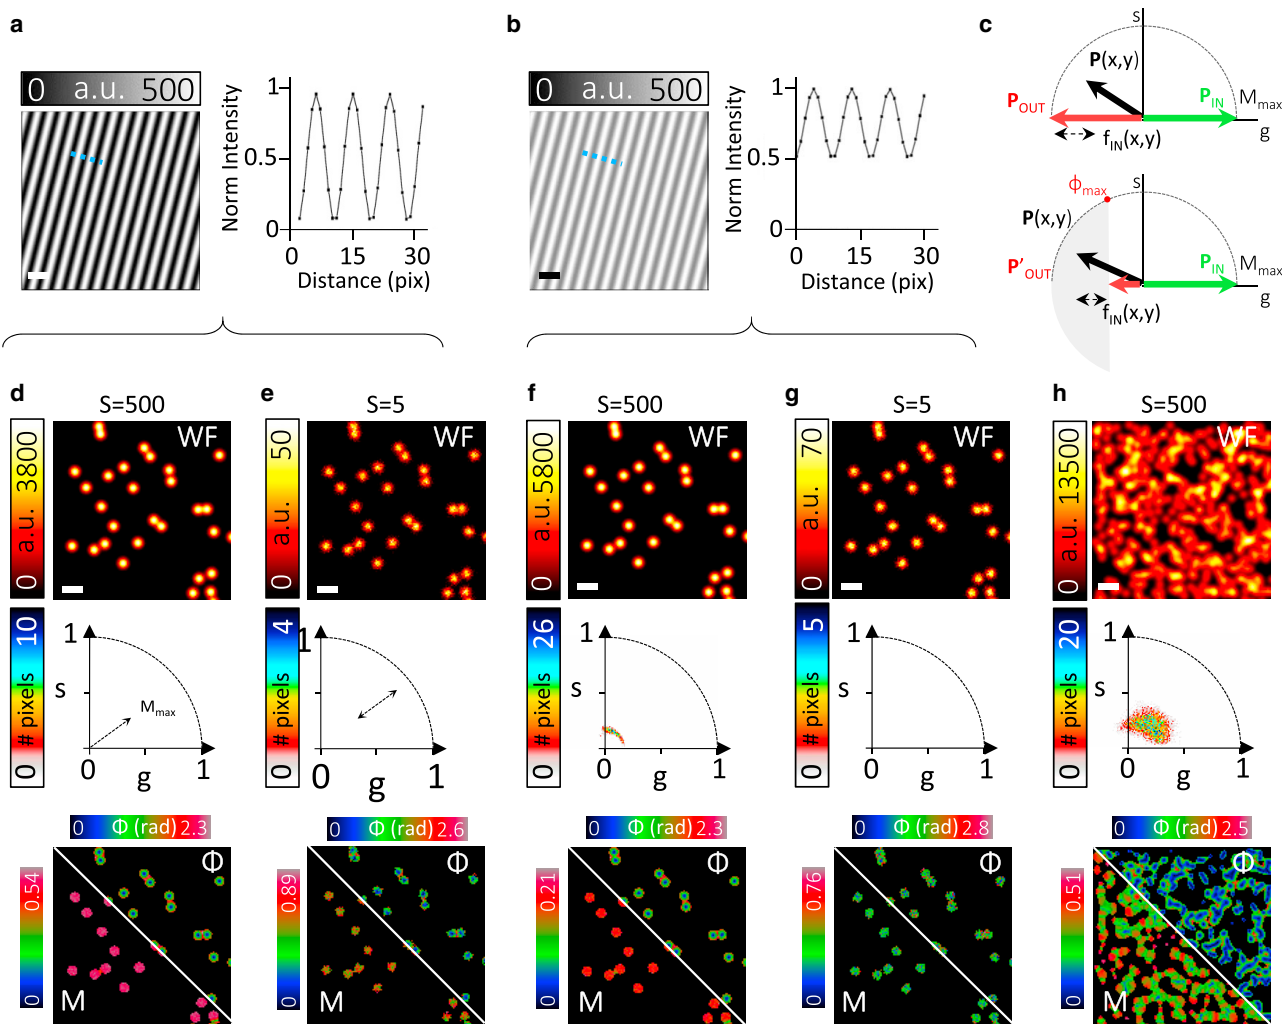

FIGURE 2 SPLIT-SIM on simulated SIM images of point-like sources. (a) Simulated image of a periodic illumination pattern with maximal contrast ( $C_p = 1$ ) and corresponding line intensity profile along the dashed line. (b) Simulated image of a periodic illumination pattern with lower contrast ( $C_p = 0.33$ ) and corresponding line intensity profile along the dashed line. (c) Schematic showing the possible setting of the phasors  $P_{in}$  and  $P_{out}$ . (d–g) SPLIT-SIM of simulated SIM images of sparse point-like sources with maximal (d and e) and low (f and g) pattern contrast and different noise levels, as determined by the intensity level  $S$ . Shown are, from top to bottom, the widefield image obtained by summing all the images of the stack (WF), the phasor plot, the modulation (M), and the phase ( $\phi$ ) image. (h) Same as in (d) but simulating a crowded object. Scale bars, 700 nm. To see this figure in color, go online.

the beads are out of focus, i.e., are at the periphery of the PSF along the  $z$  axis. The out-of-focus signal has lower modulation and phase shifted by about  $\pi$ . The algorithm removes the out-of-focus signal; namely, it assigns this signal to the “OUT” component. We observe efficient optical sectioning for both  $\phi_{max} = 0.5\pi$  and  $\phi_{max} = \pi$  (Fig. S5).

### Application of SPLIT-SIM to biological imaging

The SPLIT-SIM algorithm generates an improvement of resolution that depends on the value of the parameter  $\phi_{max}$ . Decreasing values of  $\phi_{max}$  yield a larger improvement of resolution in the focal plane. Setting  $\phi_{max} = \pi$  provides optical sectioning but only a modest increase in spatial resolution. Setting  $\phi_{max} = 0.5\pi$  provides optical sectioning and an  $\sim 2$ -fold increase in spatial resolution. Fig. 4 shows the

analysis of a 3D-SIM image of the histone H2B in HeLa cells. The SPLIT images obtained setting  $\phi_{max} = 0.5\pi$  (Fig. 4 c) and  $\phi_{max} = \pi$  (Fig. 4 d) are compared with the WF image (Fig. 4 a) and with a SIM reconstruction obtained with the NIS software (Fig. 4 b). We find by ICS that the apparent size of the structures formed by H2B is  $FWHM_{WF} = 337$  nm in the WF image,  $FWHM_{NIS} = 156$  nm in the NIS image, and  $FWHM_{SPLIT,0.5\pi} = 158$  nm in the SPLIT image. If we set  $\phi_{max} = \pi$ , we get confocal-like images, as this setting produces mainly an optical sectioning effect (Fig. 4 d). The apparent size of H2B, estimated by ICS, is in this case  $FWHM_{SPLIT,\pi} = 219$  nm.

In Fig. 5, we applied SPLIT-SIM to quantify the colocalization between functional sites in the nucleus of MCF7 cells. In particular, we compared the nanoscale spatial distribution of two samples: 1) nascent DNA replication foci

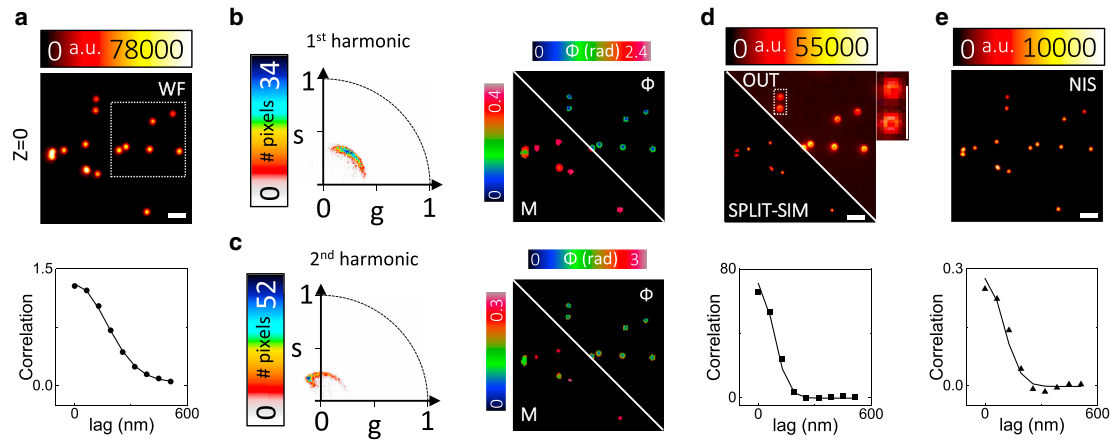

FIGURE 3 SPLIT-SIM on fluorescent spheres. (a) Widefield image of a sample of 100-nm yellow-green fluorescent spheres and corresponding autocorrelation function (ACF) calculated in the dashed box. (b) Phasor plot of the first harmonic and corresponding phase and modulation images. (c) Phasor plot of the second harmonic and corresponding phase and modulation images. (d) SPLIT-SIM image obtained with  $\phi_{\max} = 0.5\pi$ , image of the residual component corresponding to the periphery of the PSF (OUT), and ACF of the SPLIT-SIM image. For the OUT image, shown is also the zoom of a region containing two beads. (e) NIS Elements reconstruction and corresponding ACF. Scale bars, 1  $\mu\text{m}$ . To see this figure in color, go online.

(labeled through incorporation of the nucleotide analog EdU) versus PCNA, a protein involved in the DNA replication process (32) that we expect closely associated in the nucleus; and 2) RNApol2 versus the transcriptionally repressive histone marker (H3K9me3), which we expect to be spatially segregated in the nucleus. The colocalization analysis was performed using a novel, to our knowledge, approach validated on dual-color STED images of nuclear foci (30) and recently extended to dual-color SIM images (33). This approach is largely based on the principles of ICCS (34). The amplitude of the cross-correlation function

(CCF) of a dual-color super-resolved image is compared with the amplitudes of the ACFs of the single channels to extract the colocalized fraction. In addition, the width of the CCF is compared with the width of the ACFs to get an average correlation distance, in the case of colocalized samples (30,33). Fig. 5 a shows a dual-color SPLIT-SIM image ( $\phi_{\max} = 0.5\pi$ ) of PCNA and EdU in MCF7 cells. The positive amplitude of the CCF demonstrates colocalization between PCNA and EdU (Fig. 5 b), with a colocalized fraction  $f = 0.70$  (Fig. 5 c). The average correlation distance is  $d_{\text{ICCS}} = 99$  nm. If the ICCS analysis is performed on the

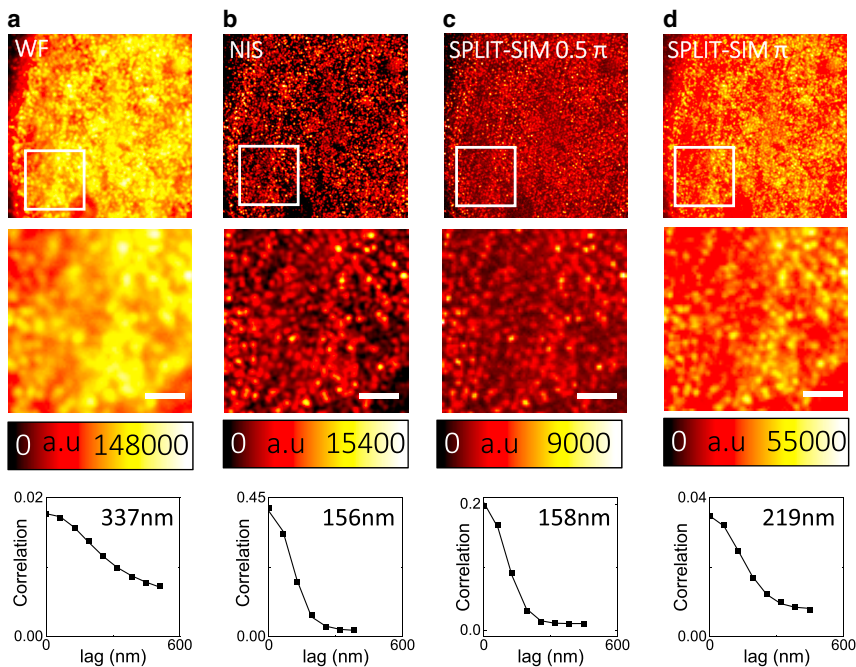

FIGURE 4 SPLIT-SIM imaging of the chromatin histone H2B. Widefield image (a), NIS reconstruction (b), and SPLIT-SIM image reconstructed with  $\phi_{\max} = 0.5\pi$  (c) or  $\phi_{\max} = \pi$  (d) of a sample of histone H2B in fixed HeLa cells. Also shown are the ACFs calculated on the white box region along with the corresponding Gaussian fit. Scale bars, 1  $\mu\text{m}$ . To see this figure in color, go online.



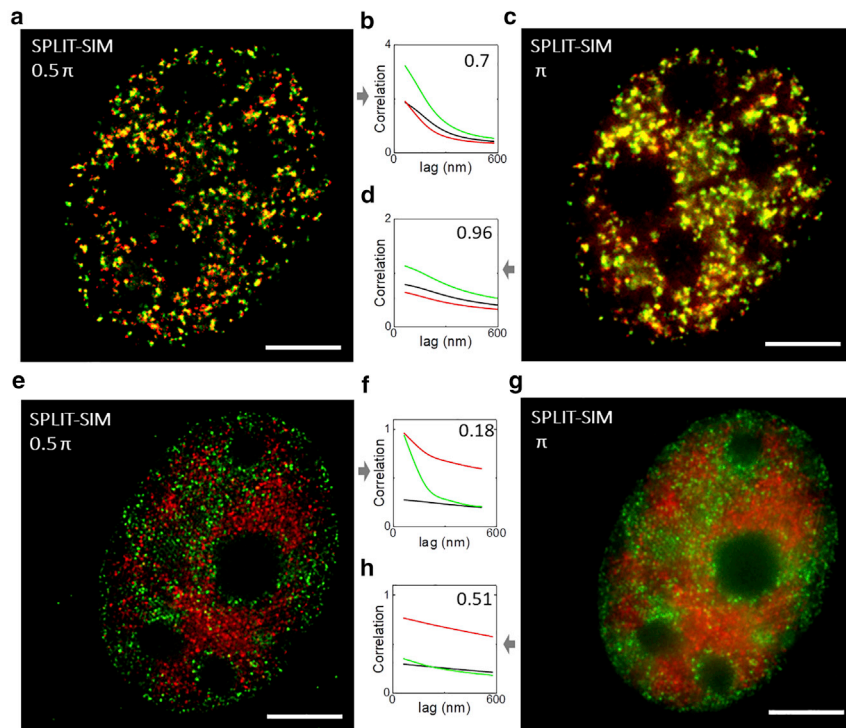

**FIGURE 5** Quantitative analysis of the nanoscale distribution of nuclear sites. (a–d) ICCS analysis of PCNA (red) and EdU (green) in MCF7 cells imaged by SPLIT-SIM with  $\phi_{\max} = 0.5\pi$  (a and b) or  $\phi_{\max} = \pi$  (c and d). (e–h) ICCS analysis of RNApol2 (red) and histone H3K9me2 (green) in MCF7 cells imaged by SPLIT-SIM with  $\phi_{\max} = 0.5\pi$  (e and f) or  $\phi_{\max} = \pi$  (g and h). Shown are the image CCF (black) and ACF of the PCNA (red) and EdU (green) channels. Numbers indicate the measured value of colocalized fraction. Scale bars, 5  $\mu\text{m}$ . To see this figure in color, go online.

same SPLIT-SIM image processed with  $\phi_{\max} = \pi$ , the colocalized fraction raises up to  $f = 0.96$  (Fig. 5 c) whereas the average correlation distance is  $d_{\text{ICCS}} = 92$  nm. The different value of colocalized fraction in the two reconstructions is due to the different level of spatial resolution. At the resolution provided by  $\phi_{\max} = \pi$  ( $R = 210$  nm), most of the PCNA and EdU sites appear overlapped ( $f = 0.96$ ). In contrast, at the resolution provided by  $\phi_{\max} = 0.5\pi$  ( $R = 130$  nm), some PCNA and EdU sites appear less overlapped, resulting in a lower value of colocalized fraction ( $f = 0.70$ ). Fig. 5 e shows a dual-color SPLIT-SIM image ( $\phi_{\max} = 0.5\pi$ ) of RNApol2 and H3K9me3. In this case, the lower amplitude of the CCF indicates the absence of colocalization between RNApol2 and H3K9me3 ( $f = 0.18$ ), at a resolution of 130 nm, as expected (Fig. 5 f). The same ICCS analysis performed on the SPLIT-SIM images of the same cell, processed with  $\phi_{\max} = \pi$ , yields a larger value of the colocalized fraction ( $f = 0.5$ , Fig. 5 h).

## DISCUSSION

In this work, we have shown that the additional spatial information encoded within SIM data can be decoded by the SPLIT method. The SPLIT-SIM approach is different, in concept, from most SIM reconstruction algorithms. In these algorithms, each image of a SIM data set, obtained with a given position of the illumination pattern, is transformed into the Fourier space (the space of the image spatial frequencies) and combined with information from the other images (15). In contrast, SPLIT exploits the information en-

coded into an additional channel of the microscope to extract, at each pixel, a fraction of the intensity corresponding to the center of the PSF. In SPLIT-SIM, this additional channel is represented by the varying position of the illumination pattern, which induces variations of the intensity at each pixel. We have shown that fluorophores in the center and at the periphery of the PSF have different fingerprints on this channel. For this reason, it is possible to decompose the intensity at each pixel into two components and to generate a super-resolved image. Clearly, the use of the word “lifetime” in the SPLIT acronym is improper in the context of SIM. However, the entire method is fully inspired to the very same original SPLIT concept, with the main difference that the lifetime dimension is substituted by the dimension of the illumination pattern phase. SPLIT-SIM is based on phasor analysis and does not require deconvolution.

One potential application of the SPLIT-SIM method is the imaging of chromatin in the nucleus. Attractive features of SIM are the moderate levels of illumination power and the compatibility with multicolor imaging. For this reason, SIM is a widely used technique to investigate the spatial organization of chromatin at a spatial scale of  $\sim 100$  nm (35–37). In this respect, we have shown that SPLIT-SIM is a simple tool to generate super-resolved images of chromatin and other functional sites in the nucleus. We have also demonstrated that SPLIT-SIM, in combination with ICS and ICCS, can be used to extract quantitative parameters such as the resolution of the images, the colocalization fraction, and the distance between functional nuclear sites.

It will be of interest to extend this robust SIM-ICCS analysis to data acquired with faster SIM setups (38,39) and study the organization of chromatin, dynamically, in living cells. Information on the organization of chromatin functional motifs at a scale of  $\sim 100$  nm, extracted by SIM-ICCS, would be complementary to other live-cell methods, such as Förster resonance energy transfer, that provide spatial information on a scale below  $\sim 10$  nm (40,41).

Thus far, the SPLIT method has been applied only in the context of STED microscopy (10–14). This work is the first demonstration, to our knowledge, that SPLIT can be applied to other types of SR imaging techniques. We envision that the SPLIT algorithm can find applications in other SR approaches, such as image-scanning microscopy (42,43) or the recent combination of SIM with single-molecule localization (e.g., SIMFLUX (44) and SIMPLE (45)).

## SUPPORTING MATERIAL

Supporting material can be found online at <https://doi.org/10.1016/j.bpj.2021.04.027>.

## ACKNOWLEDGMENTS

The authors thank Marco Scotto and Michele Oneto for technical support. The authors thank Rainer Heintzmann (University of Jena) for helpful suggestions.

Imaging was performed at the Nikon Imaging Center at the Istituto Italiano di Tecnologia, generously supported by Nikon. L.L. was supported by Associazione Italiana per la Ricerca sul Cancro under MFAG 2018 - ID. 21931 project. Part of this work has been developed under the PRIN 20177XJCHX\_003, for A.D. L.L. acknowledges support from University of Catania under the program Programma Ricerca di Ateneo UNICT 2020-2022-linea 2.

## REFERENCES

- Betzig, E., G. H. Patterson, ..., H. F. Hess. 2006. Imaging intracellular fluorescent proteins at nanometer resolution. *Science*. 313:1642–1645.
- Hess, S. T., T. P. Girirajan, and M. D. Mason. 2006. Ultra-high resolution imaging by fluorescence photoactivation localization microscopy. *Biophys. J.* 91:4258–4272.
- Huang, B., W. Wang, ..., X. Zhuang. 2008. Three-dimensional super-resolution imaging by stochastic optical reconstruction microscopy. *Science*. 319:810–813.
- Vicidomini, G., P. Bianchini, and A. Diaspro. 2018. STED super-resolved microscopy. *Nat. Methods*. 15:173–182.
- Hofmann, M., C. Eggeling, ..., S. W. Hell. 2005. Breaking the diffraction barrier in fluorescence microscopy at low light intensities by using reversibly photoswitchable proteins. *Proc. Natl. Acad. Sci. USA*. 102:17565–17569.
- Lanzano, L., G. Vicidomini, ..., A. Diaspro. 2018. STED microscopy: exploring fluorescence lifetime gradients for super-resolution at reduced illumination intensities. In *Multiphoton Microscopy and Fluorescence Lifetime Imaging*. K. König, ed. De Gruyter, p. 85.
- Enderlein, J. 2005. Breaking the diffraction limit with dynamic saturation optical microscopy. *Appl. Phys. Lett.* 87:094105.
- Vicidomini, G., G. Moneron, ..., S. W. Hell. 2011. Sharper low-power STED nanoscopy by time gating. *Nat. Methods*. 8:571–573.
- Castello, M., G. Tortarolo, ..., G. Vicidomini. 2016. Gated-sted microscopy with subnanosecond pulsed fiber laser for reducing photobleaching. *Microsc. Res. Tech.* 79:785–791.
- Lanzanò, L., I. Coto Hernández, ..., G. Vicidomini. 2015. Encoding and decoding spatio-temporal information for super-resolution microscopy. *Nat. Commun.* 6:6701.
- Coto Hernández, I., M. Castello, ..., G. Vicidomini. 2019. Efficient two-photon excitation stimulated emission depletion nanoscopy exploiting spatiotemporal information. *Neurophotonics*. 6:045004.
- Tortarolo, G., Y. Sun, ..., G. Vicidomini. 2019. Photon-separation to enhance the spatial resolution of pulsed STED microscopy. *Nanoscale*. 11:1754–1761.
- Pellicci, S., G. Tortarolo, ..., L. Lanzanò. 2020. Improving SPLIT-STED super-resolution imaging with tunable depletion and excitation power. *J. Phys. D Appl. Phys.* 53:234003.
- Sarmiento, M. J., M. Oneto, ..., L. Lanzanò. 2018. Exploiting the tunability of stimulated emission depletion microscopy for super-resolution imaging of nuclear structures. *Nat. Commun.* 9:3415.
- Heintzmann, R., and T. Huser. 2017. Super-resolution structured illumination microscopy. *Chem. Rev.* 117:13890–13908.
- Wu, Y., and H. Shroff. 2018. Faster, sharper, and deeper: structured illumination microscopy for biological imaging. *Nat. Methods*. 15:1011–1019.
- Schermelleh, L., A. Ferrand, ..., G. P. C. Drummen. 2019. Super-resolution microscopy demystified. *Nat. Cell Biol.* 21:72–84.
- Gustafsson, M. G. 2005. Nonlinear structured-illumination microscopy: wide-field fluorescence imaging with theoretically unlimited resolution. *Proc. Natl. Acad. Sci. USA*. 102:13081–13086.
- Demmerle, J., C. Innocent, ..., L. Schermelleh. 2017. Strategic and practical guidelines for successful structured illumination microscopy. *Nat. Protoc.* 12:988–1010.
- Ball, G., J. Demmerle, ..., L. Schermelleh. 2015. SIMcheck: a toolbox for successful super-resolution structured illumination microscopy. *Sci. Rep.* 5:15915.
- Lal, A., C. Shan, and P. Xi. 2016. Structured illumination microscopy image reconstruction algorithm. *IEEE J. Sel. Top. Quantum Electron.* 22:50–63.
- Huang, X., J. Fan, ..., L. Chen. 2018. Fast, long-term, super-resolution imaging with Hessian structured illumination microscopy. *Nat. Biotechnol.* 36:451–459.
- Wicker, K., O. Mandula, ..., R. Heintzmann. 2013. Phase optimisation for structured illumination microscopy. *Opt. Express*. 21:2032–2049.
- Müller, M., V. Mönkemöller, ..., T. Huser. 2016. Open-source image reconstruction of super-resolution structured illumination microscopy data in ImageJ. *Nat. Commun.* 7:10980.
- Křížek, P., T. Lukeš, ..., G. M. Hagen. 2016. SIMToolbox: a MATLAB toolbox for structured illumination fluorescence microscopy. *Bioinformatics*. 32:318–320.
- Digman, M. A., V. R. Caiolfa, ..., E. Gratton. 2008. The phasor approach to fluorescence lifetime imaging analysis. *Biophys. J.* 94:L14–L16.
- Malacrida, L., D. M. Jameson, and E. Gratton. 2017. A multidimensional phasor approach reveals LAURDAN photophysics in NIH-3T3 cell membranes. *Sci. Rep.* 7:9215.
- Fereidouni, F., A. N. Bader, and H. C. Gerritsen. 2012. Spectral phasor analysis allows rapid and reliable unmixing of fluorescence microscopy spectral images. *Opt. Express*. 20:12729–12741.
- Lévêque, O. 2020. Siemens star. MATLAB Central File Exchange <https://www.mathworks.com/matlabcentral/fileexchange/68982-siemens-star>.
- Oneto, M., L. Scipioni, ..., L. Lanzanò. 2019. Nanoscale distribution of nuclear sites by super-resolved image cross-correlation spectroscopy. *Biophys. J.* 117:2054–2065.

31. Scipioni, L., E. Gratton, ..., L. Lanzaò. 2016. Phasor analysis of local ICS detects heterogeneity in size and number of intracellular vesicles. *Biophys. J.* 111:619–629.
32. Choe, K. N., and G. L. Moldovan. 2017. Forging ahead through darkness: PCNA, still the principal conductor at the replication fork. *Mol. Cell.* 65:380–392.
33. Cainero, I., E. Cerutti, ..., L. Lanzaò. 2021. Measuring nanoscale distances by structured illumination microscopy and image cross-correlation spectroscopy (SIM-ICCS). *Sensors (Basel)*. 21:2010.
34. Comeau, J. W., S. Costantino, and P. W. Wiseman. 2006. A guide to accurate fluorescence microscopy colocalization measurements. *Biophys. J.* 91:4611–4622.
35. Kraus, F., E. Miron, ..., Y. Markaki. 2017. Quantitative 3D structured illumination microscopy of nuclear structures. *Nat. Protoc.* 12:1011–1028.
36. Chagin, V. O., C. S. Casas-Delucchi, ..., M. C. Cardoso. 2016. 4D Visualization of replication foci in mammalian cells corresponding to individual replicons. *Nat. Commun.* 7:11231.
37. Markaki, Y., M. Gunkel, ..., T. Cremer. 2010. Functional nuclear organization of transcription and DNA replication: a topographical marriage between chromatin domains and the interchromatin compartment. *Cold Spring Harb. Symp. Quant. Biol.* 75:475–492.
38. Markwirth, A., M. Lachetta, ..., M. Müller. 2019. Video-rate multi-color structured illumination microscopy with simultaneous real-time reconstruction. *Nat. Commun.* 10:4315.
39. Abrahamsson, S., H. Blom, ..., H. Brismar. 2017. Multifocus structured illumination microscopy for fast volumetric super-resolution imaging. *Biomed. Opt. Express.* 8:4135–4140.
40. Lou, J., L. Scipioni, ..., E. Hinde. 2019. Phasor histone FLIM-FRET microscopy quantifies spatiotemporal rearrangement of chromatin architecture during the DNA damage response. *Proc. Natl. Acad. Sci. USA.* 116:7323–7332.
41. Pelicci, S., A. Diaspro, and L. Lanzaò. 2019. Chromatin nanoscale compaction in live cells visualized by acceptor-to-donor ratio corrected Förster resonance energy transfer between DNA dyes. *J. Biophotonics.* 12:e201900164.
42. Müller, C. B., and J. Enderlein. 2010. Image scanning microscopy. *Phys. Rev. Lett.* 104:198101.
43. Castello, M., G. Tortarolo, ..., G. Vicidomini. 2019. A robust and versatile platform for image scanning microscopy enabling super-resolution FLIM. *Nat. Methods.* 16:175–178.
44. Cnossen, J., T. Hinsdale, ..., S. Stallinga. 2020. Localization microscopy at doubled precision with patterned illumination. *Nat. Methods.* 17:59–63.
45. Reymond, L., J. Ziegler, ..., S. Wieser. 2019. SIMPLE: structured illumination based point localization estimator with enhanced precision. *Opt. Express.* 27:24578–24590.

**Biophysical Journal, Volume 120**

**Supplemental information**

**Chromatin investigation in the nucleus using a phasor approach to structured illumination microscopy**

**Isotta Cainero, Elena Cerutti, Mario Faretta, Gaetano Ivan Dellino, Pier Giuseppe Pelicci, Paolo Bianchini, Giuseppe Vicidomini, Alberto Diaspro, and Luca Lanzaò**



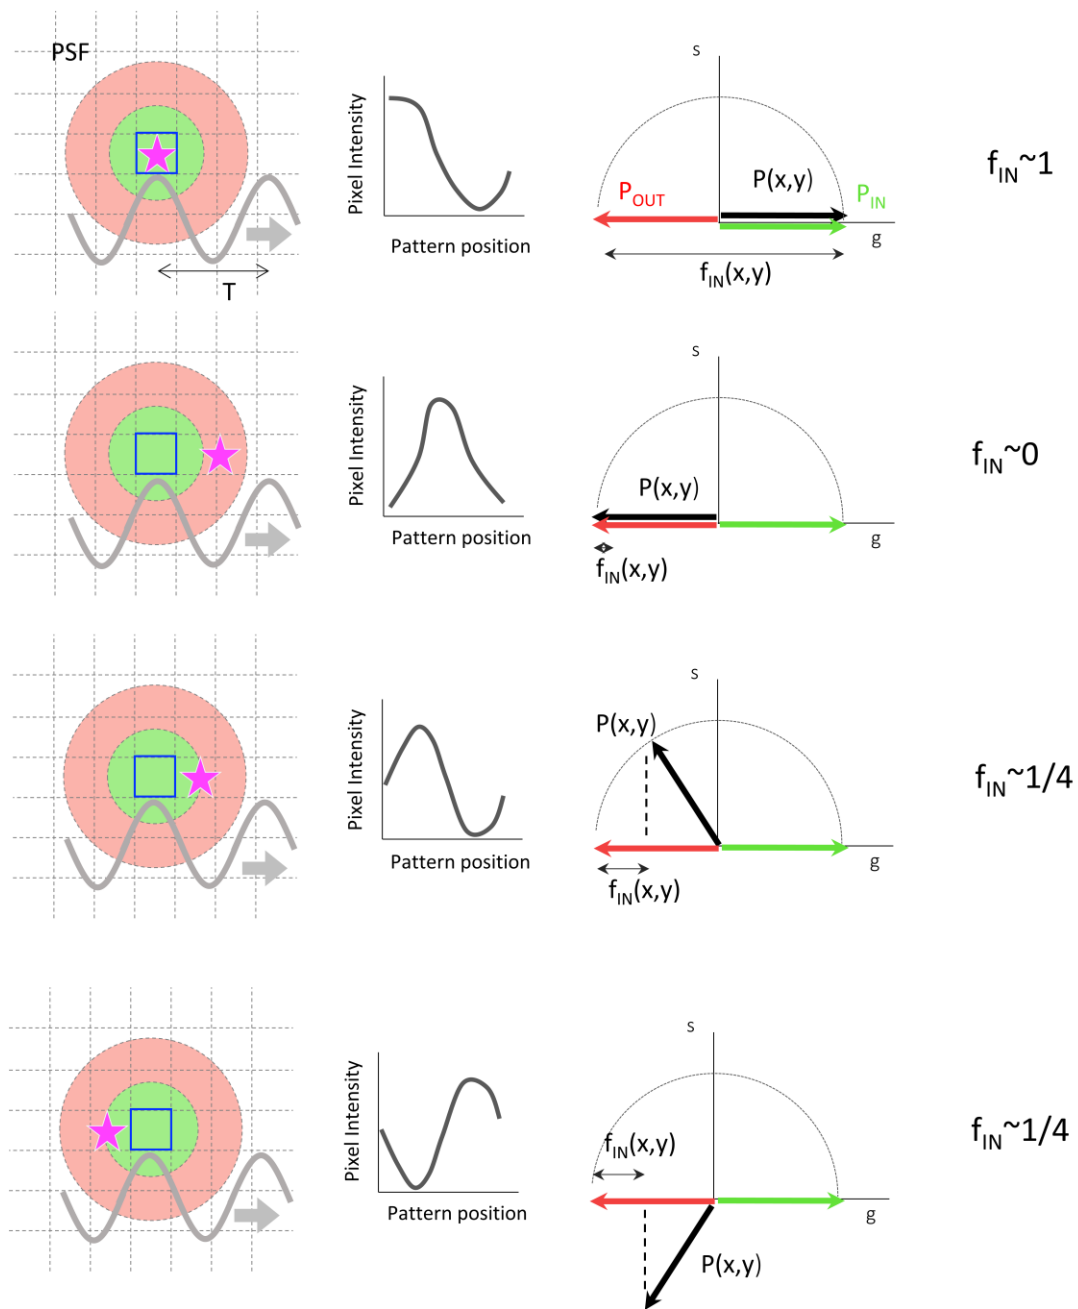

5

6 **Figure S1 | Phasors of single fluorophores.** a) Schematic of the SPLIT-SIM processing for the case of a single  
 7 fluorophore located at different position with respect to the center of the pixel. Shown are (from left to right) the PSF  
 8 and an illumination pattern of period  $T$  translating in the direction of the arrow, the profile of the pixel intensity as a  
 9 function of the pattern position, the decomposition of the corresponding phasor  $P(x,y)$  in the components  $P_{in}$  and  $P_{out}$ .  
 10 Different positions of the fluorophore (indicated by a star) correspond to different phasors and to different values of  
 11 the calculated fraction  $f_{IN}(x,y)$ .

12

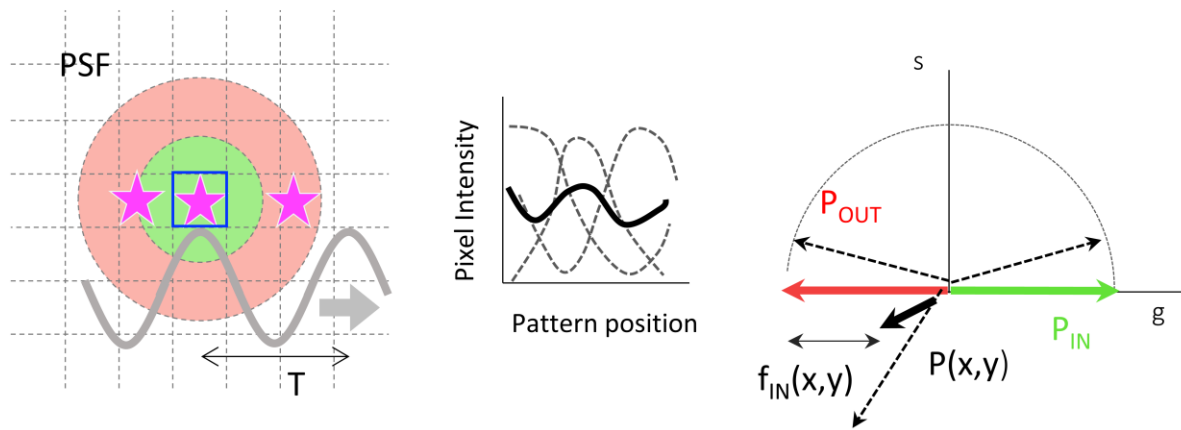

13

14 **Figure S2 | Phasors of multiple fluorophores inside the PSF.** a) Schematic of the SPLIT-SIM processing for the  
 15 case of a multiple fluorophores (indicated by stars) inside the PSF. Shown are (from left to right) the PSF and an  
 16 illumination pattern of period  $T$  translating in the direction of the arrow, the profile of the pixel intensity as a function  
 17 of the pattern position, the decomposition of the corresponding phasor  $\mathbf{P}(x,y)$  in the components  $\mathbf{P}_{in}$  and  $\mathbf{P}_{out}$ . The  
 18 phasor  $\mathbf{P}(x,y)$  is the linear combination of the phasors of the single fluorophores (indicated by dashed arrows).

19

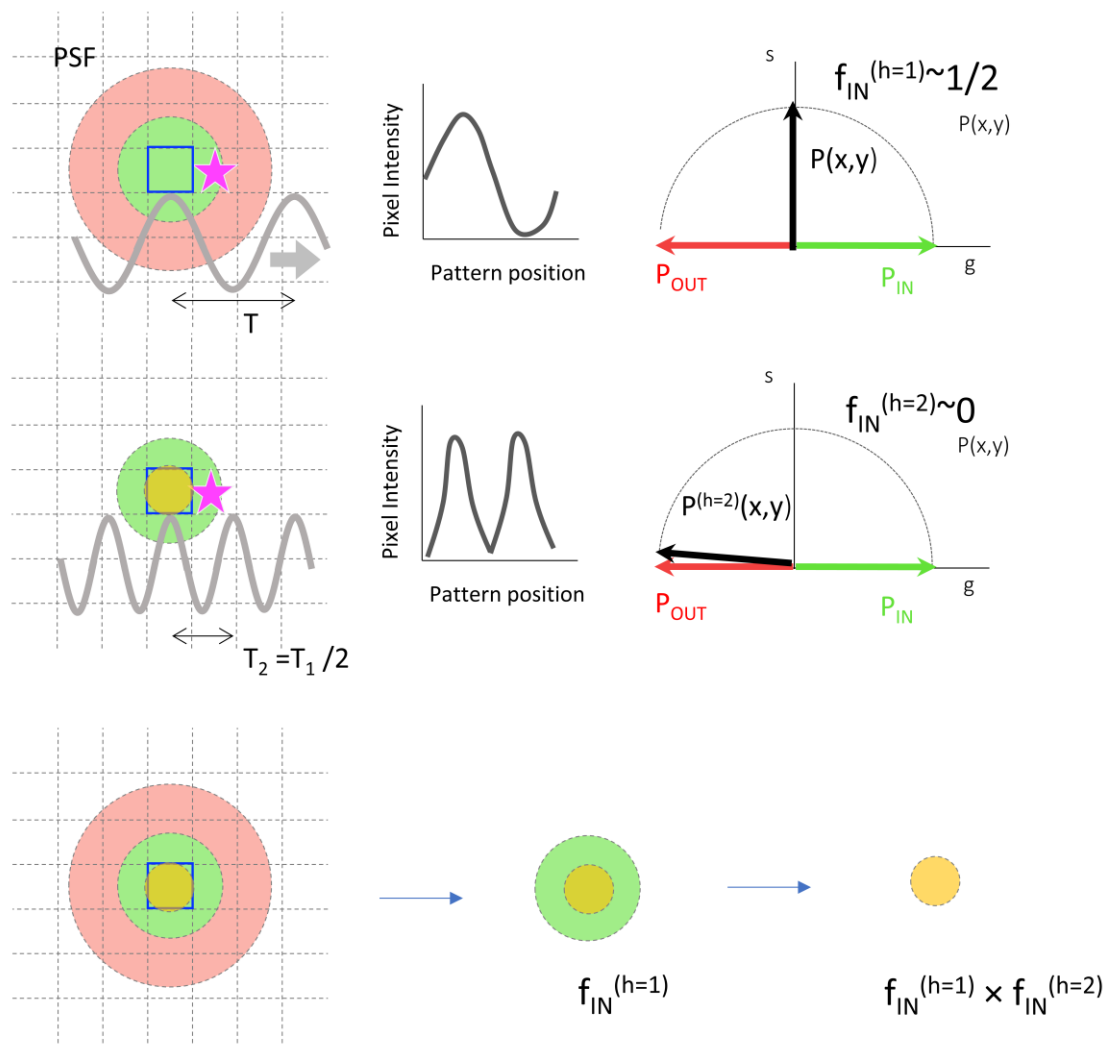

20

21 **Figure S3 | Calculation of fraction from multiple harmonics.** Schematic of the SPLIT-SIM processing using  
 22 information from two harmonics. The top row shows the calculation of the fraction  $f_{in}^{(h=1)}$  according to Eq.4 in the  
 23 Main Text. The middle row shows the calculation of the fraction  $f_{in}^{(h=2)}$  according to Eq.5 in the Main Text. The  
 24 bottom row shows the calculation of the fraction  $f_{in} = f_{in}^{(h=1)} f_{in}^{(h=2)}$  according to Eq.6 in the Main Text.

25

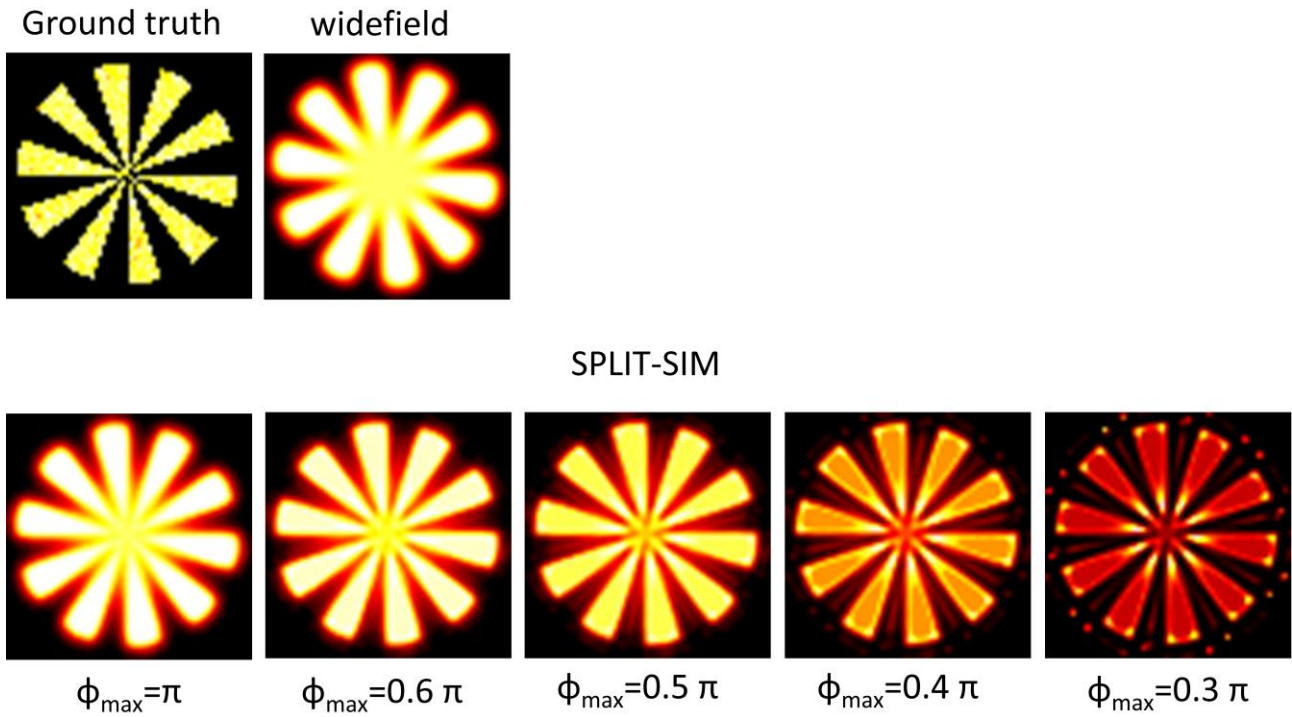

26

27 **Figure S4 | SPLIT-SIM on Siemens star.** SPLIT-SIM processing on a simulated SIM image of a Siemens star  
 28 pattern as a function of the parameter  $\phi_{\max}$ . Shown is the Siemens star object used in the simulation (Ground truth),  
 29 the widefield image (WF), the SPLIT-SIM images obtained for different values of  $\phi_{\max}$ .

30



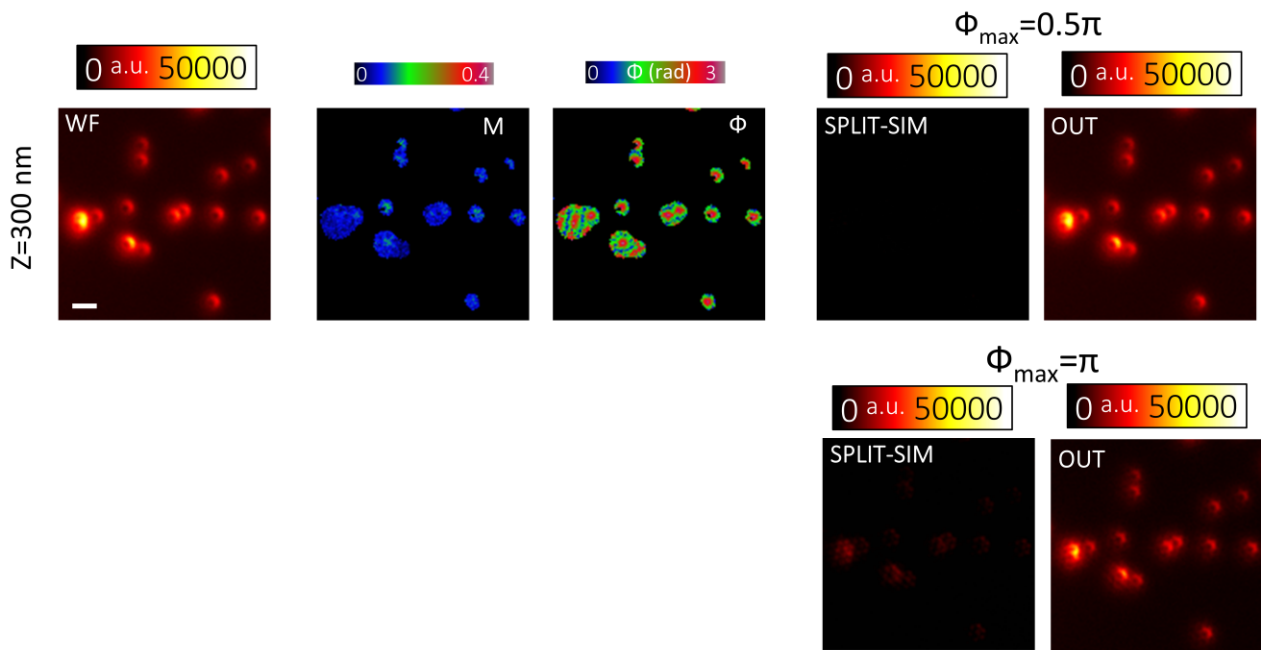

31

32 **Figure S5 | SPLIT-SIM on out-of-focus signal.** SPLIT-SIM is performed on a sample of 100-nm fluorescent spheres  
 33 (same sample of Fig.3) at an out-of-focus distance  $z=300\text{nm}$ . Shown are the widefield image (WF), the phase and  
 34 modulation images (first harmonic), the SPLIT-SIM images calculated with  $\phi_{\text{max}}=0.5\pi$  or  $\phi_{\text{max}}=\pi$ , respectively, along  
 35 with the corresponding residual components (OUT). This out-of-focus signal is correctly assigned to the OUT  
 36 component, indicating optical sectioning effect. Scale bar  $1\mu\text{m}$ .

37

38
